# Supplementary material for: Constraints on the G1/S transition pathway may favor selection of multicellularity as a passenger phenotype
Source: eLife. 2026 Jun 18;15:RP109833. doi: 10.7554/eLife.109833 (PMC13278735; doi:10.7554/eLife.109833)
Supplement: Figure 1—figure supplement 1—source data 1. [file elife-109833-fig1-figsupp1-data1.xlsx]

## Sheet: Figure 1 - figure supplement 1A
	Snowflake #	Number of cells
	1	6
	2	24
	3	12
	4	3
	5	3
	6	5
	7	15
	8	4
	9	11
	10	14
	11	21
	12	10
	13	4
	14	3
	15	15
	16	16
	17	24
	18	28
	19	6
	20	5
	21	8
	22	5
	23	3
	24	10
	25	5
	26	9
	27	7
	28	34
	29	3
	30	3
	31	13
	32	14
	33	17
	34	3
	35	7
	36	12
	37	9
	38	3
	39	6
	40	43
	41	11
	42	7
	43	4
	44	3
	45	21
	46	14
	47	3
	48	6
	49	30
	50	4
	51	6
	52	8
	53	13
	54	47
	55	18
	56	126
	57	9
	58	7
	59	4
	60	10
	61	8
	62	10
	63	11
	64	14
	65	133
	66	3
	67	10
	68	68
	69	45
	70	9
	71	11
	72	7
	73	92
	74	9
	75	3
	76	11
	77	6
	78	12
	79	5
	80	4
	81	10
	82	36
	83	5
	84	6
	85	6
	86	21
	87	27
	88	15
	89	10
	90	9
	91	29
	92	12
	93	21
	94	7
	95	10
	96	22
	97	5
	98	12
	99	6
	100	7
	101	6
	102	6
	103	7
	104	4
	105	4
	106	13
	107	11
	108	14
	109	19
	110	8
	111	10
	112	8
	113	8
	114	8
	115	6
	116	6
	117	4
	118	30
	119	11
	120	4
	121	16
	122	26
	123	7
	124	7
	125	8
	126	7
	127	3
	128	2
	129	5
	130	3
	131	3
	132	3
	133	2
	134	2
	135	3
	136	2
	137	6
	138	3
	139	3
	140	180
	141	11
	142	5
	143	6
	144	7
	145	14
	146	52
	147	4
	148	5
	149	7
	150	4
	151	21
	152	6
	153	5
	154	9
	155	9
	156	9
	157	60
	158	5
	159	8
	160	5
	161	10
	162	7
	163	5
	164	12
	165	5
	166	4
	167	24
	168	9
	169	103
	170	9
	171	7
	172	9
	173	30
	174	9
	175	14
	176	143
	177	4
	178	21
	179	5
	180	5
	181	6
	182	30
	183	8
	184	6
	185	5
	186	9
	187	16
	188	7
	189	3
	190	3
	191	3
	192	3
	193	3
	194	3
	195	2
	196	3
	197	3
	198	3
	199	3
	200	4

## Sheet: Figure 1 - figure supplement 1F
	ACE2/ACE2 cln3/cln3					ace2/ace2 cln3/cln3					ACE2/ACE2 CLN3/CLN3					ace2/ace2 CLN3/CLN3
	cell #	equatorial radius	polar radius	Cell Volume		cell #	equatorial radius	polar radius	Cell Volume		cell #	equatorial radius	polar radius	Cell Volume		cell #	equatorial radius	polar radius	Cell Volume
	1	6.75035	6.17383	134.721		1	7.69864	6.29106	159.537		1	5.36902	5.23842	77.1425		1	5.53846	5.37734	83.8539
	2	5.47643	5.21174	77.8864		2	4.63369	4.48379	48.7772		2	6.26182	5.6793	105.752		2	6.76682	5.93067	124.621
	3	5.99885	5.83859	107.073		3	6.05278	5.74629	104.648		3	2.5155	2.45185	7.9179		3	5.10959	4.79006	61.3856
	4	4.75903	4.386	47.9352		4	6.34104	6.24985	129.687		4	6.59069	5.72562	113.129		4	6.51234	5.70204	110.865
	5	5.80643	5.54737	93.5585		5	6.8462	5.35593	102.829		5	4.32583	4.13605	38.7472		5	5.74754	5.46658	89.9317
	6	7.04351	5.3814	106.802		6	8.65337	6.82658	211.15		6	7.43431	6.10437	145.051		6	5.19571	5.19179	73.3294
	7	4.95203	4.6817	56.8314		7	6.01754	5.65315	100.693		7	5.51541	5.28152	80.5554		7	3.29785	3.20919	17.7837
	8	5.09713	4.08711	44.5817		8	4.75301	3.9602	39.0303		8	5.06972	4.90582	63.8859		8	5.41527	5.15373	75.3115
	9	6.29007	5.35175	94.3292		9	8.75607	7.13178	233.187		9	5.97375	5.39817	91.1462		9	5.41629	5.09963	73.7526
	10	5.99989	5.74195	103.576		10	6.27625	5.97496	117.319		10	4.60963	4.3108	44.852		10	7.1676	5.96213	133.406
	11	9.80845	7.27364	271.709		11	6.05827	5.58355	98.8935		11	5.95981	5.61871	98.5152		11	6.18558	5.76906	107.792
	12	6.25683	5.74086	107.971		12	8.17317	6.67761	190.823		12	4.65375	4.38621	46.8792		12	4.72707	4.46082	49.2516
	13	5.90483	4.88542	73.7922		13	6.57675	5.7345	113.24		13	7.0148	5.51608	111.757		13	4.8208	4.81677	58.5637
	14	8.73112	6.10982	170.658		14	5.10987	4.84448	62.7918		14	5.60074	5.35195	83.9977		14	7.16066	6.8373	175.276
	15	5.4825	5.11546	75.1186		15	9.55498	6.8487	234.663		15	5.51088	5.50165	87.3385		15	5.23294	4.99467	68.353
	16	7.34083	5.97626	137.279		16	6.18704	5.90668	113.024		16	5.99615	5.7345	103.243		16	6.70276	6.12429	131.633
	17	6.04238	5.73034	103.889		17	9.08369	6.46603	198.855		17	4.30795	4.21882	40.1468		17	5.71253	5.48145	89.8705
	18	5.51315	4.90878	69.5578		18	6.13055	5.25463	88.6304		18	6.97926	6.01646	132.279		18	4.78248	4.5744	52.3987
	19	2.12165	2.10096	4.90351		19	8.57632	5.7769	149.861		19	5.49543	5.23859	78.964		19	6.86561	6.32553	143.837
	20	8.13953	6.32922	170.726		20	6.95831	6.24027	141.876		20	4.13717	3.93021	33.4605		20	3.65892	3.15523	19.0728
	21	5.69247	5.47377	89.3042		21	5.44336	5.01462	71.6708		21	5.44901	5.01692	71.811		21	2.75015	2.39269	8.24381
	22	5.03472	4.90242	63.3572		22	6.1066	6.05002	117.034		22	4.5288	4.36031	45.0835		22	5.21205	4.94967	66.8591
	23	7.28365	4.6175	81.3131		23	5.60289	4.20543	51.8838		23	4.77378	4.43422	49.1467		23	5.47318	5.36053	82.3481
	24	5.43793	5.24675	78.3813		24	8.32847	5.845	148.981		24	6.0384	5.01941	79.6573		24	6.47589	5.06926	87.1339
	25	4.52099	4.07321	39.2741		25	5.47874	5.3195	81.1747		25	2.33193	2.0442	5.10222		25	4.73723	4.73586	55.6315
	26	6.93787	6.08492	134.504		26	5.01132	3.93661	40.6627		26	6.33663	5.11284	86.7325		26	5.90871	5.05007	78.9018
	27	5.36553	5.33287	79.8974		27	6.62892	5.80536	116.977		27	6.72176	5.36122	101.16		27	4.34385	4.21159	40.3427
	28	7.22861	5.76473	125.78		28	6.40758	5.66067	107.505		28	5.16466	5.08365	69.8861		28	4.57552	4.5728	50.096
	29	5.16645	5.10203	70.4168		29	5.70492	5.6734	96.1467		29	8.60043	5.84246	153.713		29	4.90815	4.68425	56.3893
	30	8.14285	6.13971	160.72		30	4.39632	3.1393	22.6857		30	4.60602	4.42921	47.3125		30	3.15662	2.9495	14.3786
	31	3.73265	3.14995	19.392		31	5.5663	5.17431	78.0315		31	7.40262	5.50014	117.255		31	6.49428	5.89241	118.064
	32	11.6415	6.53013	259.926		32	3.43678	3.33964	20.07		32	6.95697	5.64349	116.015		32	4.99467	4.82291	60.8307
	33	6.56032	6.05682	126.012		33	6.61529	5.79751	116.421		33	5.16465	4.97091	66.8209		33	5.25234	5.16161	73.2693
	34	4.4186	3.79236	33.2738		34	7.92426	6.63539	182.68		34	4.128	3.48406	26.2367		34	6.02798	5.23542	86.5113
	35	4.3522	3.82513	33.3426		35	5.97839	5.87466	108.031		35	4.28385	3.65803	30.0143		35	4.87439	4.86489	60.404
	36	5.99156	5.71107	102.323		36	6.47646	5.68593	109.632		36	6.52835	6.47646	143.377		36	5.41271	5.17789	75.9833
	37	5.16363	4.87519	64.2595		37	4.72296	4.31823	46.1131		37	6.3914	5.84563	114.355		37	4.65692	4.60281	51.6587
	38	5.15032	4.84609	63.3309		38	9.41788	7.23947	258.444		38	3.44242	3.31547	19.8131		38	6.11341	5.74481	105.641
	39	6.75559	6.4154	145.582		39	8.71724	6.54293	195.399		39	5.36691	5.13738	74.1661		39	6.44541	5.89147	117.138
	40	10.6807	6.579	242.058		40	8.61933	5.98087	161.436		40	6.08902	5.47875	95.6992		40	7.04675	6.52312	156.999
	41	7.4692	6.17383	149.067		41	7.55749	6.26916	155.523		41	4.78152	4.59617	52.888		41	5.56314	5.52027	88.7645
	42	6.25683	5.87092	112.918		42	6.18273	5.21436	88.0199		42	4.73957	4.62525	53.0894		42	2.73109	2.40954	8.30236
	43	7.7443	6.05751	148.788		43	6.20781	5.47588	97.464		43	6.7102	5.41817	103.143		43	5.4122	4.89162	67.8074
	44	5.65838	4.83922	69.3811		44	6.11145	4.92908	77.7455		44	3.60226	3.58554	24.2484		44	5.06274	4.99042	66.0174
	45	5.58475	4.99032	72.8213		45	6.38155	6.247	130.397		45	6.88053	6.27815	141.999		45	6.52096	5.92777	119.976
	46	4.13605	3.76096	30.6326		46	5.71188	5.17324	80.0392		46	5.676	5.63365	94.3237		46	4.71434	4.27693	45.1527
	47	5.72853	5.62002	94.7365		47	7.6144	5.85337	136.599		47	5.11718	4.86071	63.3038		47	4.94948	4.6018	54.8801
	48	6.40599	5.55749	103.596		48	4.63703	4.4064	47.1418		48	5.83233	4.85062	71.8515		48	6.26931	5.49593	99.1518
	49	4.81984	4.44816	49.9335		49	5.88865	5.81137	104.129		49	5.39577	5.39217	82.1446		49	4.43317	4.37693	44.4684
	50	5.74738	5.41954	88.3879		50	5.71916	4.98986	74.5602		50	2.70114	2.48136	8.70816		50	5.66312	5.37156	85.5569
	51	5.74738	5.47301	90.1406		51	6.15982	5.76729	107.278		51	3.35868	3.19591	17.9621		51	4.77668	4.76912	56.8855
	52	5.49366	5.39029	83.5765		52	5.28358	5.27132	76.8714		52	4.96366	4.90878	62.6251		52	5.15032	5.031	68.256
	53	5.43954	5.01775	71.7099		53	4.687	4.61545	52.2783		53	5.33217	5.29179	78.1823		53	4.36508	4.07956	38.0381
	54	8.91128	6.708	209.954		54	6.6372	5.42636	102.329		54	6.52822	5.83253	116.28		54	5.80755	5.05062	77.5678
	55	7.74215	5.64218	129.049		55	9.245	6.20527	186.392		55	4.4547	4.18604	40.8719		55	6.84187	5.78857	120.037
	56	6.91445	6.27907	142.74		56	5.96136	5.73885	102.8		56	6.99847	5.72562	120.129		56	5.15148	4.92763	65.4948
	57	7.70174	5.85815	138.391		57	9.2441	6.26473	189.962		57	5.28939	5.25942	76.6091		57	5.21152	5.12133	71.5697
	58	5.12156	3.76096	37.9314		58	7.58369	6.09081	147.309		58	4.93667	4.81854	60.0156		58	5.08365	4.99707	66.4669
	59	6.44516	5.05616	86.2728		59	5.27729	5.10498	72.0108		59	4.45797	4.193	41.0379		59	2.5893	2.16926	6.37978
	60	7.9314	6.14648	156.892		60	5.13424	5.03761	68.2219		60	5.14061	4.73493	60.345		60	5.85811	5.42073	90.1304
	61	4.87903	4.6449	55.1168		61	6.11765	5.39217	93.1344		61	8.14285	6.14106	160.791		61	5.31333	4.84824	65.3933
	62	6.12241	5.91328	112.093		62	8.9503	6.50211	198.127		62	4.55764	4.40304	46.2641		62	4.4186	4.32198	43.2165
	63	5.76653	5.61187	95.0886		63	9.79315	6.01216	185.346		63	7.11549	5.53837	114.279		63	5.41954	5.30314	79.8044
	64	5.58437	5.53687	89.6398		64	4.33874	3.1788	22.9556		64	4.56084	4.386	45.9389		64	4.52237	4.30667	43.9186
	65	6.53013	6.45129	142.303		65	6.44211	6.00231	121.524		65	7.48895	5.79352	131.615		65	5.17901	4.70817	60.1104
	66	3.88074	3.84032	29.9673		66	6.07823	5.86946	109.641		66	5.60853	5.08078	75.807		66	4.24097	4.03434	36.1418
	67	7.0906	6.08492	137.465		67	8.7166	6.13093	171.553		67	5.4806	5.14425	75.9402		67	6.10378	5.9095	111.609
	68	5.21773	4.7301	61.1252		68	5.68446	5.38067	86.171		68	6.89909	5.85566	123.863		68	4.75171	4.56084	51.7533
	69	4.03009	3.52633	26.2397		69	5.93291	5.47301	93.0504		69	4.78866	4.70187	55.4311		69	3.42411	3.31546	19.7076
	70	6.69434	6.53968	149.906		70	4.66981	4.38937	47.1088		70	4.88481	4.58878	53.8567		70	5.21436	4.77474	62.2443
	71	4.77561	4.23986	44.9502		71	7.80684	6.19976	157.117		71	6.99328	6.47689	153.608		71	6.94686	6.02798	132.169
	72	4.7301	4.47334	49.5602		72	4.63484	3.9793	38.4279		72	2.23103	2.06086	4.96136		72	7.21542	6.08431	139.857
	73	7.74242	6.9018	193.108		73	6.15441	5.68023	103.972		73	5.5485	5.38256	84.169		73	5.50417	5.31011	81.2638
	74	3.10271	2.78249	12.5778		74	5.79751	5.76906	101.03		74	5.30314	4.91725	67.1393		74	5.59735	5.386	85.0185
	75	8.26129	6.36723	175.367		75	8.74475	6.4562	190.854		75	3.44	3.2928	19.5293		75	4.97408	4.81182	60.3018
	76	3.8893	3.0561	19.0198		76	7.61209	5.93435	140.362		76	4.94799	4.60181	54.8635		76	4.1495	4.02515	35.2013
	77	6.26182	5.79244	110.008		77	6.16135	5.75353	106.793		77	7.76683	5.95158	144.048		77	5.31254	4.79946	64.0747
	78	7.88959	6.20576	159.09		78	5.17007	4.6659	58.9339		78	3.46744	3.14929	18.0066		78	5.3953	4.82027	65.6382
	79	9.20341	7.37108	261.824		79	6.00093	5.42184	92.3655		79	6.52822	5.84428	116.75		79	4.73493	4.49954	50.1936
	80	7.40081	6.65945	171.852		80	4.84223	4.57541	53.0767		80	5.10823	4.69469	58.9498		80	6.09559	5.70834	104
	81	5.03265	4.62655	56.404		81	4.1083	3.63496	28.4224		81	7.01421	6.06719	135.192		81	5.91442	5.51484	94.1841
	82	6.85644	5.75212	118.783		82	8.41027	6.12071	164.972		82	4.09303	3.88074	32.2754		82	5.25952	4.99656	68.7524
	83	5.6685	5.24706	81.7144		83	6.4222	5.77266	112.056		83	6.21718	5.81375	110.028		83	4.18132	3.92139	33.6661
	84	8.13371	6.33386	170.853		84	5.87517	5.3535	88.1646		84	4.44816	4.42399	45.5834		84	6.35251	5.47605	99.7421
	85	5.14349	5.072	69.281		85	6.07303	5.43793	94.0309		85	5.83059	5.76985	101.634		85	4.52237	4.38621	45.5558
	86	6.63511	5.53883	106.582		86	8.0241	6.25367	164.31		86	5.58437	4.60341	61.9629		86	2.79798	2.71445	10.7946
	87	4.63483	4.57824	50.8662		87	6.73307	6.64585	155.709		87	7.75444	5.69226	131.559		87	5.02787	4.61625	56.0997
	88	5.76986	5.46168	90.1188		88	5.31577	5.08907	72.0844		88	5.34395	4.5515	57.9656		88	6.13093	5.2771	89.3955
	89	9.03092	6.10661	176.332		89	7.22666	6.10437	141		89	4.98155	4.72438	58.2174		89	3.23273	2.86942	13.9366
	90	7.15456	6.86615	176.607		90	6.05862	4.91725	76.7039		90	5.03307	4.7682	59.9157		90	6.33035	5.14744	87.8233
	91	5.71253	5.31411	84.4672		91	2.92499	2.91626	13.025		91	4.18505	4.0404	35.7724		91	4.79079	4.67515	54.8273
	92	10.7752	6.91732	269.96		92	4.42989	3.57624	29.665		92	5.17901	4.99032	67.5308		92	5.98689	4.85348	73.8425
	93	10.1943	6.837	249.509		93	6.45129	5.7274	110.805		93	6.19234	5.22609	88.5538		93	5.55915	5.41493	85.3478
	94	8.40383	6.64945	194.557		94	5.38188	5.10325	73.3882		94	2.51219	2.11281	5.87179		94	3.29617	3.12009	16.8013
	95	6.00786	5.68585	101.697		95	7.47557	6.56225	168.558		95	7.54429	6.40631	162.119		95	5.05757	4.81638	61.4304
	96	5.55516	5.26359	80.586		96	6.32816	6.07275	122.193		96	5.02686	4.68725	57.8271		96	5.03761	4.91123	63.6215
	97	5.62758	5.35915	84.6277		97	6.50793	6.18139	130.201		97	5.76906	5.25269	83.3426		97	6.1178	5.43861	94.7478
	98	5.25445	5.20016	74.3976		98	6.0177	4.98299	78.2365		98	5.15032	4.69567	59.4604		98	5.19179	5.18591	73.1083
	99	7.23436	6.29858	150.274		99	8.72683	6.65132	202.149		99	4.86494	4.47799	51.079		99	2.55769	2.236	6.6956
	100	6.17215	5.86773	111.269		100	4.06145	3.79455	30.6197		100	7.75343	5.94661	143.559		100	4.78866	4.58086	52.6147
	101	4.81638	4.67124	55.0281		101	5.59628	4.59084	61.7565		101	4.95644	4.54851	53.6916		101	2.88228	2.84093	12.1803
	102	7.00679	5.99989	132.07		102	6.89517	6.08663	133.751		102	3.77091	3.58483	25.3736		102	4.92908	4.90671	62.1364
	103	6.19368	5.88684	112.386		103	8.25625	7.04351	214.466		103	6.46836	4.7138	75.2549		103	6.9242	6.14915	137.088
	104	6.30815	5.65397	105.586		104	9.2676	7.02606	239.546		104	4.88201	4.57541	53.5128		104	6.2833	5.20939	89.2813
	105	9.56363	6.46353	209.2		105	8.05036	6.38583	171.889		105	4.66634	4.34454	46.1172		105	5.39834	5.02144	71.2713
	106	6.00405	5.9354	110.75		106	4.80298	3.83653	37.0157		106	8.28266	6.04031	158.23		106	3.93562	3.40026	23.8252
	107	6.57014	6.33973	138.266		107	5.93961	5.68918	100.66		107	3.00116	2.95365	13.709		107	5.28917	5.21737	75.3859
	108	5.00821	4.85296	61.758		108	8.4937	6.64068	196.119		108	5.40536	5.11863	74.1532		108	5.34049	5.11772	73.2374
	109	5.81806	5.66444	97.7444		109	8.35331	7.095	220.172		109	3.92456	3.45207	24.4878		109	5.12585	5.1114	70.1202
	110	4.81854	4.26445	45.8817		110	7.52815	6.25367	154.155		110	4.20698	4.10577	37.1328		110	5.56713	5.02144	73.4997
	111	5.199	5.03761	69.0824		111	6.28908	5.80724	111.052		111	4.3822	3.8212	33.5035		111	3.6286	3.31769	20.9127
	112	5.16	5.16	71.9362		112	5.58624	5.23772	80.2422		112	4.96273	4.68068	56.9295		112	4.78383	4.69941	55.3174
	113	9.71277	7.20568	264.053		113	5.01713	4.56654	54.7807		113	2.4476	2.10875	5.69888		113	5.35097	5.2831	78.2003
	114	8.34533	6.46431	182.594		114	5.52784	5.43305	85.4361		114	6.60369	5.08946	89.563		114	4.497	4.18828	41.304
	115	6.29697	5.80819	111.227		115	5.00041	4.60667	55.5622		115	6.58287	5.90395	120.143		115	6.54109	6.00724	123.594
	116	7.35413	6.06681	141.726		116	5.67866	5.18062	79.8008		116	3.85087	3.65237	26.8973		116	6.09099	5.89116	110.685
	117	5.47992	5.18592	77.1657		117	6.26846	6.07157	120.993		117	4.92116	4.61569	54.896		117	5.65658	5.61376	93.3386
	118	7.11738	6.19036	142.807		118	4.19262	3.483	26.6312		118	8.01593	6.13971	158.215		118	2.90146	2.64021	10.59
	119	5.27131	4.64022	59.4284		119	5.51626	5.45063	85.8098		119	4.902	4.83793	60.0746		119	5.83486	5.40587	89.2813
	120	9.49161	7.16708	255.284		120	6.02868	5.47538	94.6345		120	5.11546	5.08907	69.3681		120	5.22446	5.16304	72.9208
	121	5.75525	5.72481	98.761		121	3.61214	3.19796	19.3423		121	5.64605	5.20575	80.1144		121	2.79533	2.71445	10.7844
	122	5.6435	5.19375	79.7093		122	7.68227	6.16279	152.772		122	5.32916	5.20435	75.5773		122	7.366	6.45	160.454
	123	8.58364	6.39877	184.019		123	4.99656	4.88542	62.4417		123	4.27176	3.91874	34.3477		123	5.67966	5.30353	83.6472
	124	7.20375	6.2154	145.712		124	6.09661	5.70971	104.067		124	4.27898	4.15034	38.5928		124	6.96182	6.09789	135.544
	125	7.99164	7.26204	220.674		125	5.06335	4.79235	60.8884		125	6.62326	5.58421	108.142		125	5.70561	5.62483	94.519
	126	5.42567	5.07345	73.1239		126	7.79657	6.50979	172.996		126	5.56983	5.52031	88.8725		126	5.75245	5.19375	81.2482
	127	8.385	7.13593	223.564		127	5.59489	5.38459	84.9367		127	8.27638	5.81395	146.481		127	4.7301	4.36031	47.0874
	128	5.72998	5.32731	85.1467		128	6.06866	5.66463	101.961		128	5.59628	5.35389	83.9918		128	7.04203	6.1122	137.75
	129	7.06038	6.09843	137.487		129	3.90864	3.54823	25.7661		129	5.00031	4.71953	58.3167		129	5.38256	5.29372	78.9786
	130	9.57665	7.18344	258.748		130	7.45108	6.24552	152.179		130	8.0483	6.04031	153.752		130	5.73853	4.99263	74.8958
	131	5.86899	5.69827	99.7811		131	6.43224	6.21095	129.92		131	4.78866	4.71027	55.6293		131	5.41766	4.9392	69.2028
	132	7.61671	6.05919	146.418		132	5.84295	5.09519	79.4241		132	4.9732	4.89903	62.4963		132	5.63299	5.33633	83.9892
	133	4.92721	4.87116	61.2159		133	8.86353	7.01873	228.624		133	7.24987	6.04031	138.499		133	5.27991	5.13738	72.9638
	134	5.19571	5.03853	69.0639		134	7.89038	5.97496	147.491		134	5.21174	4.97654	67.5829		134	6.30225	6.01324	119.32
	135	6.15637	5.63891	102.497		135	6.13971	6.0235	116.639		135	5.5422	5.44252	85.9568		135	6.69945	6.29212	138.877
	136	8.43819	6.23871	171.964		136	3.82037	3.44517	23.7424		136	6.10982	5.21015	86.8415		136	5.51021	5.38582	83.6896
	137	3.71396	3.18316	19.704		137	6.8075	5.96764	126.938		137	5.44901	4.70806	63.2412		137	4.85086	4.35469	48.1651
	138	8.49759	7.06418	222.033		138	5.6593	4.95486	72.7486		138	5.05986	4.99823	66.1865		138	4.91217	4.77692	58.6906
	139	5.76906	5.64628	96.3005		139	7.43326	5.55037	119.901		139	4.08189	3.6143	27.9196		139	5.68259	5.0771	76.6966
	140	8.64289	6.77438	207.681		140	5.66812	4.87562	70.55		140	6.28867	5.99885	118.493		140	6.17619	5.64145	102.92
	141	5.97205	5.59743	97.9716		141	7.62963	5.65838	127.905		141	5.63517	5.46426	88.0985		141	5.553	5.3535	83.33
	142	8.43546	6.86561	208.192		142	6.74056	5.2254	96.368		142	4.69124	4.56494	51.1866		142	4.39784	4.06401	38.0319
	143	5.64939	5.40399	86.3832		143	5.65296	4.62087	63.2008		143	5.80679	4.73493	68.1652		143	5.78202	5.76473	100.609
	144	7.73869	6.24922	158.241		144	4.99042	4.11108	44.162		144	5.34456	4.71909	62.3199		144	4.81379	4.74722	56.8021
	145	4.81619	4.65434	54.6284		145	9.1161	6.51914	202.856		145	8.21407	6.17316	163.897		145	6.54914	5.77994	114.559
	146	5.1114	4.94425	65.4243		146	7.86136	6.85955	193.681		146	7.15049	6.09073	138.89		146	5.75895	5.49896	91.1806
	147	6.93914	5.66508	116.605		147	5.80388	5.77882	101.484		147	5.4825	5.40608	83.8963		147	7.27552	7.11283	192.729
	148	3.44671	3.24329	18.9835		148	8.96517	6.82292	218.523		148	7.8859	6.26182	161.901		148	5.33564	4.43963	55.0654
	149	5.23842	5.13126	72.2181		149	6.24389	6.18498	125.063		149	5.75245	5.38488	87.338		149	5.44676	5.28043	79.5198
	150	8.25208	7.09617	217.576		150	6.68329	5.5895	109.329		150	4.5288	4.45797	47.1255		150	5.2101	4.83917	63.8832
	151	8.75681	6.93274	220.371		151	6.99791	6.26945	144.021		151	4.79387	4.49191	50.6461		151	7.32365	5.97344	136.828
	152	5.34603	5.34602	80.0003		152	8.30468	6.78542	200.205		152	5.27876	5.02686	69.8434		152	7.21837	5.97592	134.973
	153	8.73419	6.32466	182.934		153	6.67055	6.58139	151.285		153	5.58139	5.54437	89.8352		153	4.9659	4.93377	63.2929
	154	8.20895	6.96666	208.61		154	5.29372	5.06525	71.115		154	6.89426	6.71946	162.988		154	5.71916	4.81677	69.4771
	155	5.88346	5.69941	100.067		155	5.83059	5.73321	100.347		155	4.19597	4.01768	35.4636		155	4.93604	4.79485	59.4193
	156	8.28462	7.08456	217.72		156	6.42142	6.41406	138.324		156	4.11437	3.74433	30.2031		156	5.32369	5.02686	70.4378
	157	5.34049	4.91725	67.6122		157	6.80012	6.09707	132.36		157	4.48031	4.24035	42.1804		157	6.58698	5.85788	118.349
	158	6.29403	6.20289	126.799		158	7.55167	6.31412	157.64		158	7.32948	5.80249	129.211		158	5.29735	5.28939	77.6013
	159	5.12729	4.85767	63.3494		159	7.3167	5.97886	136.946		159	5.11017	4.98155	66.3994		159	6.85341	5.91504	125.551
	160	6.51617	5.60156	107.056		160	5.52429	5.48145	86.9092		160	5.27876	5.27837	77.0071		160	5.34105	5.25467	77.2177
	161	7.28847	6.23559	148.385		161	5.92854	5.20513	84.1028		161	6.14648	5.8186	108.959		161	4.56084	4.386	45.9389
	162	10.2728	7.71248	319.944		162	5.51357	4.687	63.4193		162	7.51141	6.93787	189.31		162	6.17425	5.87003	111.395
	163	9.65024	7.40824	277.311		163	5.8778	4.65513	66.6926		163	7.12951	6.40469	153.128		163	5.08856	5.06325	68.3049
	164	8.88603	7.05177	231.368		164	6.98363	5.9037	127.447		164	3.53575	3.3861	21.2265		164	5.34066	5.16	74.4549
	165	6.33284	6.18965	127.037		165	8.40174	6.46046	183.609		165	5.08078	4.8491	62.5534		165	5.51626	5.35593	82.8538
	166	6.50779	6.02376	123.642		166	5.74754	5.68446	97.2433		166	5.83253	5.43831	90.3199		166	5.18584	5.10417	70.7403
	167	10.1983	6.85189	250.697		167	9.81399	7.47866	287.404		167	4.06759	3.70805	29.2838		167	5.79671	5.40946	88.8154
	168	7.08268	6.03135	134.904		168	5.54717	5.12855	76.3939		168	5.11546	4.61254	56.9854		168	4.45895	4.35341	44.2478
	169	5.90483	5.40339	90.2691		169	7.2272	5.5485	116.498		169	5.92312	5.84428	105.928		169	5.47453	4.7791	65.4692
	170	6.51163	5.03307	86.3681		170	8.80996	6.88483	218.655		170	5.97626	5.74738	103.364		170	5.6385	5.6385	93.8617
	171	9.44105	6.61337	216.205		171	7.54708	5.84863	135.172		171	6.85189	5.41954	105.374		171	5.01775	4.8551	61.9304
	172	6.1846	6.02307	117.475		172	7.30672	4.80851	88.459		172	5.40262	5.20575	76.6603		172	6.97078	6.3476	147.061
	173	5.99607	5.88366	108.683		173	5.76681	5.57028	93.6891		173	6.11765	5.45206	95.2148		173	5.34105	5.29372	78.3695
	174	6.36494	4.48727	67.1055		174	4.37883	4.01538	36.9667		174	6.97674	5.5485	112.461		174	5.7318	5.34572	85.7635
	175	6.70428	6.20192	135.021		175	5.86898	5.24706	84.6044		175	4.75772	4.25504	45.1031		175	4.35028	3.63267	30.0586
	176	7.90697	6.20408	159.354		176	7.84275	5.40861	120.126		176	5.10855	4.75947	60.5917		176	6.07979	6.021	115.405
	177	9.6211	6.96719	244.534		177	7.74156	6.4616	169.242		177	4.56904	4.44302	47.2258		177	6.06437	5.69137	102.853
	178	9.57081	6.69061	224.326		178	5.05319	4.7255	59.0826		178	6.37539	6.29627	132.334		178	4.6017	4.44302	47.5634
	179	6.2999	6.04651	120.599		179	8.74212	6.79047	211.064		179	5.56721	5.51315	88.6004		179	6.31046	5.88331	114.367
	180	6.11765	6.10846	119.522		180	6.19573	6.02384	117.717		180	7.50698	6.40664	161.333		180	4.82544	4.50301	51.232
	181	9.37716	7.33657	264.275		181	7.87323	5.91544	144.253		181	5.79819	5.4825	91.2532		181	7.13152	6.22832	144.852
	182	5.96093	5.72453	102.281		182	6.42774	5.70346	109.48		182	4.97152	3.77972	37.1884		182	5.32315	5.23842	76.4834
	183	7.48561	6.01339	141.731		183	5.49896	5.30871	81.1443		183	7.85868	6.07876	152.047		183	5.5976	5.23965	80.4646
	184	6.62971	5.69685	112.658		184	5.17859	4.55881	56.3527		184	5.19896	4.58359	57.1907		184	4.6941	4.57683	51.4849
	185	6.89788	6.05922	132.602		185	5.83233	5.75429	101.117		185	7.07298	6.23118	143.794		185	6.84673	6.32699	143.508
	186	10.1372	7.06209	264.717		186	6.58125	6.04238	125.812		186	2.81223	2.81223	11.6453		186	5.08565	4.87116	63.1845
	187	10.7732	7.0376	279.379		187	4.61384	4.48067	48.5007		187	5.85673	5.59107	95.8615		187	4.01031	3.7996	30.3147
	188	10.1546	8.19455	357.035		188	6.21376	5.69763	105.619		188	4.16012	3.99327	34.7347		188	6.31046	5.9906	118.577
	189	5.805	5.78094	101.578		189	6.73056	5.72676	115.576		189	3.65835	3.45722	22.8949		189	5.07345	4.88178	63.3079
	190	3.95717	3.46744	24.9115		190	5.68024	5.33928	84.7871		190	6.79458	5.91856	124.621		190	5.14295	5.05739	68.8754
	191	6.32133	5.9522	117.263		191	9.64438	6.63845	222.539		191	4.43176	3.72651	32.2241		191	3.72738	3.48273	23.6724
	192	5.65434	5.51088	89.913		192	6.15847	6.14675	121.832		192	6.33973	5.29057	92.9126		192	5.25885	4.89672	66.0236
	193	8.9713	6.64632	207.499		193	8.24939	6.55987	185.87		193	4.70894	4.57995	51.7183		193	6.15276	5.81391	108.894
	194	6.65945	6.03308	126.916		194	7.07765	6.30679	147.402		194	6.03859	5.30196	88.8807		194	5.65397	5.47643	88.7864
	195	5.37251	4.67258	61.417		195	6.36821	5.04127	84.7416		195	5.61187	5.34066	83.8101		195	4.42096	4.21181	41.0631
	196	5.65434	5.26535	82.0795		196	6.20527	6.02015	117.754		196	4.96692	4.90242	62.5039		196	6.44903	6.00231	121.655
	197	8.3245	6.98062	212.395		197	6.85644	5.99569	129.055		197	6.23252	5.32076	92.3867		197	4.83793	4.77474	57.7508
	198	6.80559	6.04238	130.101		198	5.34049	5.26025	77.3735		198	8.41002	6.39592	180.136		198	6.02065	5.30824	88.8265
	199	4.85296	4.79387	58.3953		199	5.3793	5.25234	77.7017		199	5.52144	5.23842	79.3325		199	5.3632	5.24397	77.2225
	200	7.81755	6.90662	195.254		200	7.65364	6.09827	149.032		200	4.49283	4.43552	46.2815		200	4.10222	3.96819	33.8223
	201	5.40608	5.35156	81.0666		201	5.80819	5.03688	77.1546		201	6.65945	5.58177	108.638		201	5.61891	5.25032	81.1001
	202	5.45549	4.96147	70.3159		202	5.07072	4.37861	50.9027		202	8.80821	6.29462	182.736		202	6.77956	5.97905	126.901
	203	4.0594	3.82077	31.0287		203	8.98494	6.61697	205.983		203	6.58342	5.71581	112.617		203	7.50116	5.90483	136.944
	204	6.7725	6.59857	154.4		204	5.85337	5.75911	101.652		204	3.8657	3.43368	23.8641		204	5.43793	5.01941	71.736
	205	4.65116	4.20192	42.9986		205	7.81146	6.28286	161.453		205	7.02458	5.99607	132.237		205	5.79244	5.64145	96.5253
	206	7.96151	6.67443	185.704		206	5.19179	4.40304	52.7013		206	4.42613	4.01457	37.351		206	6.59857	5.86347	118.784
	207	5.08365	4.97092	65.7731		207	5.47588	5.32176	81.2013		207	5.6749	5.16846	79.3741		207	5.68369	5.20575	80.6485
	208	7.51418	6.76359	179.984							208	5.61187	5.35505	84.2624		208	3.70412	3.19259	19.7683
	209	8.88509	7.15456	238.137							209	5.42912	5.33638	80.9508		209	5.22808	5.16161	72.9309
	210	5.75317	5.43793	89.0784							210	4.84609	4.80687	58.6294		210	5.4825	5.28507	80.1822
	211	5.40108	5.0584	72.3611							211	5.40147	5.2408	77.6793		211	5.24992	5.07259	70.7311
	212	4.50906	4.30538	43.763							212	3.87913	3.72819	28.2311		212	4.4186	4.08189	38.5483
											213	7.02606	6.38811	150.126		213	6.66444	6.02652	126.735
											214	4.68369	4.32583	45.8908		214	6.27642	5.98878	117.866
											215	6.75281	5.83859	120.531		215	5.29372	4.9333	67.4582
											216	5.80142	5.33638	86.5019		216	4.83535	4.47799	50.7683
											217	4.79431	4.27553	45.8885		217	4.69784	4.58167	51.635
											218	4.36508	4.08443	38.1289		218	5.84246	5.19179	82.4573
											219	4.12498	3.53104	26.9294		219	3.98418	3.91395	31.9571
											220	6.22851	5.65286	104.213		220	4.13259	3.90425	32.9834
											221	4.96147	4.46543	51.8007		221	5.8408	5.68186	98.7307
											222	6.54031	5.52031	104.358
											223	3.99796	3.32972	23.2088
											224	5.1114	5.01775	67.3839
											225	6.8843	5.93295	126.882
											226	7.82154	6.65476	181.366
											227	4.44816	3.80932	33.7968
											228	5.91504	5.22609	84.5883
											229	5.57729	4.92275	70.7681
											230	5.83538	5.21015	82.9407
											231	7.59458	6.07294	146.656
											232	4.97947	4.3522	49.3854
											233	4.3803	4.24183	41.2675
											234	4.79083	4.47334	50.1966
