# Supplementary material for: Constraints on the G1/S transition pathway may favor selection of multicellularity as a passenger phenotype
Source: eLife. 2026 Jun 18;15:RP109833. doi: 10.7554/eLife.109833 (PMC13278735; doi:10.7554/eLife.109833)
Supplement: Figure 1—source data 1. [file elife-109833-fig1-data1.xlsx]

## Sheet: Fig 1B
	CLN3 background	Point 0				Point 1				Point 2				Point 3				Point 4				Point 5				Point 6				Point 7				Point 8				Point 9				Point 10
		1-2 cells	3 cells	4+ cells	tot	1-2 cells	3 cells	4+ cells	tot	1-2 cells	3 cells	4+ cells	tot	1-2 cells	3 cells	4+ cells	tot	1-2 cells	3 cells	4+ cells	tot	1-2 cells	3 cells	4+ cells	tot	1-2 cells	3 cells	4+ cells	tot	1-2 cells	3 cells	4+ cells	tot	1-2 cells	3 cells	4+ cells	tot	1-2 cells	3 cells	4+ cells	tot	1-2 cells	3 cells	4+ cells	tot
	Competiton #1	189	14	196	399	117	32	144	293	103	28	128	259	98	36	135	269	104	25	123	252	101	27	133	261	97	27	127	251	96	30	126	252	117	25	141	283	113	27	135	275	101	33	129	263
		0.473684	0.0350877	0.491228		0.399317	0.109215	0.491468		0.397683	0.108108	0.494208		0.364312	0.133829	0.501859		0.412698	0.0992063	0.488095		0.386973	0.103448	0.509579		0.386454	0.10757	0.505976		0.380952	0.119048	0.5		0.413428	0.0883392	0.498233		0.410909	0.0981818	0.490909		0.38403	0.125475	0.490494
	Competiton #2	182	23	202	407	91	39	129	259	115	26	141	282	92	28	119	239	111	21	132	264	91	34	124	249	101	27	127	255	110	27	139	276	107	31	140	278	106	32	124	262	115	30	147	292
		0.447174	0.0565111	0.496314		0.351351	0.150579	0.498069		0.407801	0.0921986	0.5		0.384937	0.117155	0.497908		0.420455	0.0795455	0.5		0.365462	0.136546	0.497992		0.396078	0.105882	0.498039		0.398551	0.0978261	0.503623		0.384892	0.111511	0.503597		0.40458	0.122137	0.473282		0.393836	0.10274	0.503425
	Competiton #3	253	47	295	595	107	21	125	253	119	23	137	279	102	22	127	251	110	20	126	256	121	24	147	292	104	22	125	251	107	23	133	263	97	34	128	259	106	23	135	264	102	31	141	274
		0.42521	0.0789916	0.495798		0.422925	0.083004	0.494071		0.426523	0.0824373	0.491039		0.406375	0.0876494	0.505976		0.429688	0.078125	0.492188		0.414384	0.0821918	0.503425		0.414343	0.0876494	0.498008		0.406844	0.0874525	0.505703		0.374517	0.131274	0.494208		0.401515	0.0871212	0.511364		0.372263	0.113139	0.514599
	Competiton #4	206	51	249	506	104	36	136	276	122	23	147	292	104	29	136	269	100	27	132	259	118	28	147	293	120	18	140	278	125	16	143	284	130	21	161	312	123	27	152	302	108	28	135	271
		0.407115	0.100791	0.492095		0.376812	0.130435	0.492754		0.417808	0.0787671	0.503425		0.386617	0.107807	0.505576		0.3861	0.104247	0.509653		0.40273	0.0955631	0.501706		0.431655	0.0647482	0.503597		0.440141	0.056338	0.503521		0.416667	0.0673077	0.516026		0.407285	0.089404	0.503311		0.398524	0.103321	0.498155
	% of each type of entity	47.3684	3.50877	49.1228		39.9317	10.9215	49.1468		39.7683	10.8108	49.4208		36.4312	13.3829	50.1859		41.2698	9.92063	48.8095		38.6973	10.3448	50.9579		38.6454	10.757	50.5976		38.0952	11.9048	50		41.3428	8.83392	49.8233		41.0909	9.81818	49.0909		38.403	12.5475	49.0494
		44.7174	5.65111	49.6314		35.1351	15.0579	49.8069		40.7801	9.21986	50		38.4937	11.7155	49.7908		42.0455	7.95455	50		36.5462	13.6546	49.7992		39.6078	10.5882	49.8039		39.8551	9.78261	50.3623		38.4892	11.1511	50.3597		40.458	12.2137	47.3282		39.3836	10.274	50.3425
		42.521	7.89916	49.5798		42.2925	8.3004	49.4071		42.6523	8.24373	49.1039		40.6375	8.76494	50.5976		42.9688	7.8125	49.2188		41.4384	8.21918	50.3425		41.4343	8.76494	49.8008		40.6844	8.74525	50.5703		37.4517	13.1274	49.4208		40.1515	8.71212	51.1364		37.2263	11.3139	51.4599
		40.7115	10.0791	49.2095		37.6812	13.0435	49.2754		41.7808	7.87671	50.3425		38.6617	10.7807	50.5576		38.61	10.4247	50.9653		40.273	9.55631	50.1706		43.1655	6.47482	50.3597		44.0141	5.6338	50.3521		41.6667	6.73077	51.6026		40.7285	8.9404	50.3311		39.8524	10.3321	49.8155
	Mean	43.8296	6.78452	49.3859		38.7601	11.8308	49.409		41.2454	9.03778	49.7168		38.556	11.161	50.283		41.2235	9.0281	49.7484		39.2387	10.4437	50.3175		40.7132	9.14624	50.1405		40.6622	9.01661	50.3212		39.7376	9.9608	50.3016		40.6072	9.92111	49.4717		38.7163	11.1169	50.1668
	Contingency table	965		942		547		534		559		553		511		517		518		513		544		551		516		519		534		541		562		570		557		546		548		552
	cln3∆ background	Point 0				Point 1				Point 2				Point 3				Point 4				Point 5				Point 6				Point 7				Point 8				Point 9				Point 10
		1-2 cells	3 cells	4+ cells	tot	1-2 cells	3 cells	4+ cells	tot	1-2 cells	3 cells	4+ cells	tot	1-2 cells	3 cells	4+ cells	tot	1-2 cells	3 cells	4+ cells	tot	1-2 cells	3 cells	4+ cells	tot	1-2 cells	3 cells	4+ cells	tot	1-2 cells	3 cells	4+ cells	tot	1-2 cells	3 cells	4+ cells	tot	1-2 cells	3 cells	4+ cells	tot	1-2 cells	3 cells	4+ cells	tot
	Competiton #1	156	48	201	405	91	24	147	262	96	28	156	280	94	29	180	303	73	34	208	315	43	36	219	298	43	20	232	295	32	18	228	278	34	14	236	284	30	17	240	287	24	15	276	315
		0.385185	0.118519	0.496296		0.347328	0.0916031	0.561069		0.342857	0.1	0.557143		0.310231	0.0957096	0.594059		0.231746	0.107937	0.660317		0.144295	0.120805	0.734899		0.145763	0.0677966	0.786441		0.115108	0.0647482	0.820144		0.119718	0.0492958	0.830986		0.10453	0.0592334	0.836237		0.0761905	0.047619	0.87619
	Competiton #2	162	55	207	424	93	23	140	256	92	23	160	275	107	33	203	343	85	33	217	335	61	22	219	302	46	15	242	303	31	21	238	290	29	19	248	296	26	18	258	302	28	15	267	310
		0.382075	0.129717	0.488208		0.363281	0.0898438	0.546875		0.334545	0.0836364	0.581818		0.311953	0.0962099	0.591837		0.253731	0.0985075	0.647761		0.201987	0.0728477	0.725166		0.151815	0.049505	0.79868		0.106897	0.0724138	0.82069		0.097973	0.0641892	0.837838		0.0860927	0.0596026	0.854305		0.0903226	0.0483871	0.86129
	Competiton #3	172	74	238	484	102	35	144	281	94	32	170	296	100	30	196	326	78	24	220	322	43	32	218	293	35	13	222	270	33	22	250	305	27	13	244	284	17	19	242	278	24	12	257	293
		0.355372	0.152893	0.491736		0.362989	0.124555	0.512456		0.317568	0.108108	0.574324		0.306748	0.0920245	0.601227		0.242236	0.0745342	0.68323		0.146758	0.109215	0.744027		0.12963	0.0481481	0.822222		0.108197	0.0721311	0.819672		0.0950704	0.0457746	0.859155		0.0611511	0.0683453	0.870504		0.0819113	0.0409556	0.877133
	Competiton #4	216	61	267	544	104	24	156	284	88	36	178	302	75	23	180	278	83	15	217	315	51	27	224	302	36	15	222	273	24	17	250	291	19	19	254	292	23	12	254	289	23	19	282	324
		0.397059	0.112132	0.490809		0.366197	0.084507	0.549296		0.291391	0.119205	0.589404		0.269784	0.0827338	0.647482		0.263492	0.047619	0.688889		0.168874	0.089404	0.741722		0.131868	0.0549451	0.813187		0.0824742	0.0584192	0.859107		0.0650685	0.0650685	0.869863		0.0795848	0.0415225	0.878893		0.0709877	0.058642	0.87037
	% of each type of entity	38.5185	11.8519	49.6296		34.7328	9.16031	56.1069		34.2857	10	55.7143		31.0231	9.57096	59.4059		23.1746	10.7937	66.0317		14.4295	12.0805	73.4899		14.5763	6.77966	78.6441		11.5108	6.47482	82.0144		11.9718	4.92958	83.0986		10.453	5.92334	83.6237		7.61905	4.7619	87.619
		38.2075	12.9717	48.8208		36.3281	8.98438	54.6875		33.4545	8.36364	58.1818		31.1953	9.62099	59.1837		25.3731	9.85075	64.7761		20.1987	7.28477	72.5166		15.1815	4.9505	79.868		10.6897	7.24138	82.069		9.7973	6.41892	83.7838		8.60927	5.96026	85.4305		9.03226	4.83871	86.129
		35.5372	15.2893	49.1736		36.2989	12.4555	51.2456		31.7568	10.8108	57.4324		30.6748	9.20245	60.1227		24.2236	7.45342	68.323		14.6758	10.9215	74.4027		12.963	4.81481	82.2222		10.8197	7.21311	81.9672		9.50704	4.57746	85.9155		6.11511	6.83453	87.0504		8.19113	4.09556	87.7133
		39.7059	11.2132	49.0809		36.6197	8.4507	54.9296		29.1391	11.9205	58.9404		26.9784	8.27338	64.7482		26.3492	4.7619	68.8889		16.8874	8.9404	74.1722		13.1868	5.49451	81.3187		8.24742	5.84192	85.9107		6.50685	6.50685	86.9863		7.95848	4.15225	87.8893		7.09877	5.8642	87.037
	Mean	37.9923	12.8315	49.1762		35.9949	9.76273	54.2424		32.159	10.2737	57.5672		29.9679	9.16695	60.8651		24.7801	8.21493	67.0049		16.5478	9.8068	73.6454		13.9769	5.50987	80.5132		10.3169	6.69281	82.9903		9.44575	5.6082	84.946		8.28395	5.7176	85.9984		7.9853	4.89009	87.1246
	Contingency table	944		913		496		587		489		664		491		759		425		862		315		880		223		918		198		966		174		982		162		994		160		1082

## Sheet: Fig 1C
		Genomic DNA range amplified by ace2::Kan primers						Genomic DNA range amplified by ACT1 primers
	well	A1	A2	A3	A4		well	A7	A8	A9	A10
	DNA quantity	1000	100	10	1		DNA quantity	1000	100	10	1
	log (DNA quantity)	3	2	1	0		log (DNA quantity)	3	2	1	0
	Cq	22.77	26.49	29.67	33.94		Cq	22.42	26.11	29.39	33.54
		Cq						DNA quantity				DNA ace2::Kan quantity/ DNA ACT1 quantity	normalization at 0,5 at 0 cycles of dilution
		ace2::Kan primers			ACT1 primers			ace2::Kan primers		ACT1 primers
		well	replicates	mean	well	replicates	mean	replicate	mean	replicate	mean		mean	normalization
	cln3∆ competition #1 0 cycles of dilutions	C1	25.44	25.345	C7	22.92	23.05	9.55456	9.80847	17.2812	16.6893	0.587711	0.599685	0.490016
		D1	25.25		D7	23.18		10.0624		16.0974
	cln3∆ competition #2 0 cycles of dilutions	E1	25.25	25.22	E7	22.89	23.12	10.0624	10.1453	17.4233	16.3954	0.618791		0.51593
		F1	25.19		F7	23.35		10.2283		15.3676
	cln3∆ competition #3 0 cycles of dilutions	G1	25.17	25.215	G7	22.86	22.95	10.2842	10.1596	17.5665	17.1454	0.592554		0.494054
		H1	25.26		H7	23.04		10.035		16.7244
	cln3∆ competition#1 10 cycles of dilutions	C2	24.4	24.665	C8	23.89	24.035	12.6857	11.8325	13.2617	12.7571	0.927526		0.773344
		D2	24.93		D8	24.18		10.9794		12.2525
	cln3∆ competition #2 10 cycles of dilutions	E2	24.66	24.68	E8	23.72	23.9	11.8178	11.7538	13.8915	13.2415	0.887645		0.740093
		F2	24.7		F8	24.08		11.6897		12.5915
	cln3∆ competition #3 10 cycles of dilutions	G2	24.48	24.51	G8	23.88	23.945	12.4121	12.3114	13.2979	13.0662	0.942236		0.785609
		H2	24.54		H8	24.01		12.2107		12.8344
		Cq						DNA quantity				DNA ace2::Kan quantity/ DNA ACT1 quantity	normalization at 0,5 at 0 cycles of dilution
		ace2::Kan primers			ACT1 primers			ace2::Kan primers		ACT1 primers
		well	replicates	mean	well	replicates	mean	replicate	mean	replicate	mean		moyenne	normalisation
	CLN3 WT competition #1 0 cycles of dilutions	C3	23.79	24.05	C9	22.23	22.495	14.9802	13.9905	20.8622	19.4573	0.719033	0.759934	0.473089
		D3	24.31		D9	22.76		13.0007		18.0525
	CLN3 WT competition #2 0 cycles of dilutions	E3	23.53	23.895	E9	22.49	22.62	16.0803	14.6297	19.4331	18.7675	0.779525		0.51289
		F3	24.26		F9	22.75		13.1791		18.1019
	CLN3 WT competition #3 0 cycles of dilutions	G3	23.91	24.185	G9	23.04	22.925	14.4982	13.4891	16.7244	17.2661	0.781245		0.514022
		H3	24.46		H9	22.81		12.4799		17.8079
	CLN3 WT competition#1 10 cycles of dilutions	C4	24.21	24.395	C10	22.78	22.915	13.3599	12.7191	17.9543	17.3165	0.734509		0.483271
		D4	24.58		D10	23.05		12.0783		16.6788
	CLN3 WT competition #2 10 cycles of dilutions	E4	23.48	23.745	E10	22.3	22.415	16.301	15.2047	20.4674	19.8447	0.766183		0.504111
		F4	24.01		F10	22.53		14.1084		19.2221
	CLN3 WT competition #3 10 cycles of dilutions	G4	24.52	24.54	G10	22.91	22.94	12.2775	12.2109	17.3284	17.1877	0.710447		0.467439
		H4	24.56		H10	22.97		12.1444		17.047

## Sheet: Fig 1D
	Empty overexpression vector	Point 0				Point 1				Point 2				Point 3				Point 4				Point 5				Point 6				Point 7				Point 8				Point 9				Point 10
		1-2 cells	3 cells	4+ cells	tot	1-2 cells	3 cells	4+ cells	tot	1-2 cells	3 cells	4+ cells	tot	1-2 cells	3 cells	4+ cells	tot	1-2 cells	3 cells	4+ cells	tot	1-2 cells	3 cells	4+ cells	tot	1-2 cells	3 cells	4+ cells	tot	1-2 cells	3 cells	4+ cells	tot	1-2 cells	3 cells	4+ cells	tot	1-2 cells	3 cells	4+ cells	tot	1-2 cells	3 cells	4+ cells	tot
	Competiton #1	141	62	205	408	78	44	127	249	75	49	130	254	89	59	154	302	75	59	136	270	84	51	128	263	64	56	127	247	80	42	113	235	77	35	120	232	89	53	138	280	88	41	126	255
		0.345588	0.151961	0.502451		0.313253	0.176707	0.51004		0.295276	0.192913	0.511811		0.294702	0.195364	0.509934		0.277778	0.218519	0.503704		0.319392	0.193916	0.486692		0.259109	0.226721	0.51417		0.340426	0.178723	0.480851		0.331897	0.150862	0.517241		0.317857	0.189286	0.492857		0.345098	0.160784	0.494118
	Competiton #2	175	99	260	534	71	54	125	250	84	55	145	284	104	52	156	312	77	41	117	235	74	56	113	243	76	62	126	264	87	56	143	286	103	48	133	284	75	59	118	252	86	62	128	276
		0.327715	0.185393	0.486891		0.284	0.216	0.5		0.295775	0.193662	0.510563		0.333333	0.166667	0.5		0.32766	0.174468	0.497872		0.304527	0.230453	0.465021		0.287879	0.234848	0.477273		0.304196	0.195804	0.5		0.362676	0.169014	0.46831		0.297619	0.234127	0.468254		0.311594	0.224638	0.463768
	Competiton #3	184	60	245	489	63	54	141	258	64	56	144	264	95	88	202	385	62	55	133	250	71	60	147	278	58	69	139	266	67	65	140	272	68	45	147	260	57	57	141	255	59	56	149	264
		0.376278	0.122699	0.501022		0.244186	0.209302	0.546512		0.242424	0.212121	0.545455		0.246753	0.228571	0.524675		0.248	0.22	0.532		0.255396	0.215827	0.528777		0.218045	0.259398	0.522556		0.246324	0.238971	0.514706		0.261538	0.173077	0.565385		0.223529	0.223529	0.552941		0.223485	0.212121	0.564394
	% of each type of entity	34.5588	15.1961	50.2451		31.3253	17.6707	51.004		29.5276	19.2913	51.1811		29.4702	19.5364	50.9934		27.7778	21.8519	50.3704		31.9392	19.3916	48.6692		25.9109	22.6721	51.417		34.0426	17.8723	48.0851		33.1897	15.0862	51.7241		31.7857	18.9286	49.2857		34.5098	16.0784	49.4118
		32.7715	18.5393	48.6891		28.4	21.6	50		29.5775	19.3662	51.0563		33.3333	16.6667	50		32.766	17.4468	49.7872		30.4527	23.0453	46.5021		28.7879	23.4848	47.7273		30.4196	19.5804	50		36.2676	16.9014	46.831		29.7619	23.4127	46.8254		31.1594	22.4638	46.3768
		37.6278	12.2699	50.1022		24.4186	20.9302	54.6512		24.2424	21.2121	54.5455		24.6753	22.8571	52.4675		24.8	22	53.2		25.5396	21.5827	52.8777		21.8045	25.9398	52.2556		24.6324	23.8971	51.4706		26.1538	17.3077	56.5385		22.3529	22.3529	55.2941		22.3485	21.2121	56.4394
	Mean	34.9861	15.3351	49.6788		28.048	20.067	51.8851		27.7825	19.9566	52.261		29.1596	19.6867	51.1536		28.4479	20.4329	51.1192		29.3105	21.3399	49.3497		25.5011	24.0323	50.4666		29.6982	20.4499	49.8519		31.8704	16.4318	51.6979		27.9669	21.5647	50.4684		29.3392	19.9181	50.7427
	Contingency table	721		710		364		393		383		419		487		512		369		386		396		388		385		392		397		396		376		400		390		397		392		403
	WHI5 overexpression vector	Point 0				Point 1				Point 2				Point 3				Point 4				Point 5				Point 6				Point 7				Point 8				Point 9				Point 10
		1-2 cells	3 cells	4+ cells	tot	1-2 cells	3 cells	4+ cells	tot	1-2 cells	3 cells	4+ cells	tot	1-2 cells	3 cells	4+ cells	tot	1-2 cells	3 cells	4+ cells	tot	1-2 cells	3 cells	4+ cells	tot	1-2 cells	3 cells	4+ cells	tot	1-2 cells	3 cells	4+ cells	tot	1-2 cells	3 cells	4+ cells	tot	1-2 cells	3 cells	4+ cells	tot	1-2 cells	3 cells	4+ cells	tot
	Competiton #1	167	72	233	472	82	46	162	290	58	67	178	303	71	65	179	315	59	48	156	263	41	57	171	269	42	45	217	304	42	41	174	257	36	40	224	300	26	33	209	268	20	36	235	291
		0.353814	0.152542	0.493644		0.282759	0.158621	0.558621		0.191419	0.221122	0.587459		0.225397	0.206349	0.568254		0.224335	0.18251	0.593156		0.152416	0.211896	0.635688		0.138158	0.148026	0.713816		0.163424	0.159533	0.677043		0.12	0.133333	0.746667		0.0970149	0.123134	0.779851		0.0687285	0.123711	0.80756
	Competiton #2	207	55	254	516	77	45	161	283	60	62	182	304	71	62	208	341	66	41	162	269	74	53	192	319	45	55	196	296	41	35	216	292	29	30	196	255	41	29	226	296	27	27	226	280
		0.401163	0.106589	0.492248		0.272085	0.159011	0.568905		0.197368	0.203947	0.598684		0.208211	0.181818	0.609971		0.245353	0.152416	0.60223		0.231975	0.166144	0.601881		0.152027	0.185811	0.662162		0.140411	0.119863	0.739726		0.113725	0.117647	0.768627		0.138514	0.097973	0.763514		0.0964286	0.0964286	0.807143
	Competiton #3	177	73	245	495	78	67	155	300	86	60	175	321	61	57	163	281	64	61	173	298	37	42	192	271	43	54	227	324	33	31	239	303	25	27	223	275	19	30	233	282	20	33	253	306
		0.357576	0.147475	0.494949		0.26	0.223333	0.516667		0.267913	0.186916	0.545171		0.217082	0.202847	0.580071		0.214765	0.204698	0.580537		0.136531	0.154982	0.708487		0.132716	0.166667	0.700617		0.108911	0.10231	0.788779		0.0909091	0.0981818	0.810909		0.0673759	0.106383	0.826241		0.0653595	0.107843	0.826797
	% of each type of entity	35.3814	15.2542	49.3644		28.2759	15.8621	55.8621		19.1419	22.1122	58.7459		22.5397	20.6349	56.8254		22.4335	18.251	59.3156		15.2416	21.1896	63.5688		13.8158	14.8026	71.3816		16.3424	15.9533	67.7043		12	13.3333	74.6667		9.70149	12.3134	77.9851		6.87285	12.3711	80.756
		40.1163	10.6589	49.2248		27.2085	15.9011	56.8905		19.7368	20.3947	59.8684		20.8211	18.1818	60.9971		24.5353	15.2416	60.223		23.1975	16.6144	60.1881		15.2027	18.5811	66.2162		14.0411	11.9863	73.9726		11.3725	11.7647	76.8627		13.8514	9.7973	76.3514		9.64286	9.64286	80.7143
		35.7576	14.7475	49.4949		26	22.3333	51.6667		26.7913	18.6916	54.5171		21.7082	20.2847	58.0071		21.4765	20.4698	58.0537		13.6531	15.4982	70.8487		13.2716	16.6667	70.0617		10.8911	10.231	78.8779		9.09091	9.81818	81.0909		6.73759	10.6383	82.6241		6.53595	10.7843	82.6797
	Mean	37.0851	13.5535	49.3614		27.1614	18.0322	54.8064		21.89	20.3995	57.7105		21.6897	19.7005	58.6099		22.8151	17.9875	59.1974		17.3641	17.7674	64.8685		14.0967	16.6835	69.2198		13.7582	12.7235	73.5183		10.8212	11.6387	77.5401		10.0968	10.9163	78.9868		7.68389	10.9328	81.3833
	Contingency table	751		732		395		478		393		535		387		550		339		491		304		555		284		640		223		629		187		643		178		668		163		714
