# Supplementary material for: Constraints on the G1/S transition pathway may favor selection of multicellularity as a passenger phenotype
Source: eLife. 2026 Jun 18;15:RP109833. doi: 10.7554/eLife.109833 (PMC13278735; doi:10.7554/eLife.109833)
Supplement: Figure 2—figure supplement 1—source data 1. [file elife-109833-fig2-figsupp1-data1.xlsx]

## Sheet: Fig 2 - figure sup 1B
		replicates	Doubling time in proliferation phase
	ACE2/ACE2 cln3/cln3	1	74.57
		2	81.83
		3	81.4
		4	81.54
	ace2/ace2 cln3/cln3	1	81.1
		2	77.75
		3	82.21
	ACE2/ACE2 CLN3/CLN3	1	77.65
		2	76.46
		3	77.93
		4	69.8
	ace2/ace2 CLN3/CLN3	1	77.33
		2	74.54
		3	79.73
		4	75.39

## Sheet: Fig 2 - figure sup 1C
		replicates	filtered volume (mL)	initial filter mass (mg)	final filter mass (mg)	filtered dry biomass (mg)	dry biomass /mL
	ACE2/ACE2 cln3/cln3	1	5	56.9	69.3	12.4	2.48
		2	5	57.3	69.4	12.1	2.42
		3	5	57.2	68.8	11.6	2.32
	ace2/ace2 cln3/cln3	1	5	57	68.9	11.9	2.38
		2	5	56.9	69	12.1	2.42
		3	5	57.2	69.3	12.1	2.42
	ACE2/ACE2 CLN3/CLN3	1	5	57.2	68.6	11.4	2.28
		2	5	57.3	68.5	11.2	2.24
		3	5	56.8	68.5	11.7	2.34
	ace2/ace2 CLN3/CLN3	1	5	56.8	68.6	11.8	2.36
		2	5	57	68.4	11.4	2.28
		3	5	57.4	68.8	11.4	2.28

## Sheet: Fig 2 - figure sup 1D
			methylen blue staining
		replicates	positive cells	negative cells	total cells	% of dead cells
	ACE2/ACE2 cln3/cln3	1	9	271	280	3.21429
		2	12	297	309	3.8835
		3	13	294	307	4.23453
	ace2/ace2 cln3/cln3	1	11	296	307	3.58306
		2	10	291	301	3.32226
		3	12	288	300	4
	ACE2/ACE2 CLN3/CLN3	1	13	298	311	4.18006
		2	11	289	300	3.66667
		3	12	287	299	4.01338
	ace2/ace2 CLN3/CLN3	1	11	289	300	3.66667
		2	13	292	305	4.2623
		3	13	307	320	4.0625

## Sheet: Fig 2 - figure sup 1E
		ACE2/ACE2 CLN3/CLN3						ACE2/ACE2 CLN3/CLN3
		replicate #1	replicate #2	replicate #3	total	Cummulative cells forming a bud		Budding index	SD	n	Contigency table
number of initial cells		115	102	105	322						bud	unbud
# of initial cells forming a first bud at t=	60	1	2	5	8	8		0.0248447	0.00445823	322	8	314
	75	6	8	10	24	32		0.0993789	0.0178329	322	32	290
	90	15	19	22	56	88		0.273292	0.0490405	322	88	234
	105	15	10	7	32	120		0.372671	0.0668734	322	120	202
	120	15	11	10	36	156		0.484472	0.0869354	322	156	166
	135	7	12	13	32	188		0.583851	0.104768	322	188	134
	150	14	7	9	30	218		0.677019	0.121487	322	218	104
		ace2/ace2 CLN3/CLN3						ace2/ace2 CLN3/CLN3
		replicate #1	replicate #2	replicate #3	total	Cummulative cells forming a bud		Budding index	SD	n	Contigency table
number of initial cells		112	106	101	319						bud	unbud
# of cell forming a first bud at t=	60	1	1	2	4	4		0.0125392	0.00223957	319	4	315
	75	8	13	3	24	28		0.0877743	0.015677	319	28	291
	90	13	14	14	41	69		0.216301	0.0386326	319	69	250
	105	13	13	15	41	110		0.344828	0.0615882	319	110	209
	120	14	11	11	36	146		0.45768	0.0817443	319	146	173
	135	14	12	16	42	188		0.589342	0.10526	319	188	131
	150	10	10	9	29	217		0.680251	0.121497	319	217	102

## Sheet: Fig 2 - figure sup 1F
		ACE2 CLN3						ACE2 CLN3
		replicate #1	replicate #2	replicate #3	total	Cummulative cells forming a bud		Budding index	SD	n	Contigency table
number of initial cells		95	111	91	297						bud	unbud
# of initial cells forming a first bud at t=	60	0	0	0	0	0		0	0	297	0	297
	75	14	0	1	15	15		0.0505051	0.00870388	297	15	282
	90	12	2	7	21	36		0.121212	0.0208893	297	36	261
	105	12	12	9	33	69		0.232323	0.0400379	297	69	228
	120	13	13	16	42	111		0.373737	0.0644087	297	111	186
	135	5	10	9	24	135		0.454545	0.0783349	297	135	162
	150	6	14	11	31	166		0.558923	0.096323	297	166	131
		ace2 CLN3						ace2 CLN3
		replicate #1	replicate #2	replicate #3	total	Cummulative cells forming a bud		Budding index	SD	n	Contigency table
number of initial cells		130	102	95	327						bud	unbud
# of cell forming a first bud at t=	60	0	0	0	0	0		0	0	327	0	327
	75	7	0	2	9	9		0.0275229	0.00497701	327	9	318
	90	17	1	3	21	30		0.0917431	0.01659	327	30	297
	105	22	10	10	42	72		0.220183	0.0398161	327	72	255
	120	15	15	15	45	117		0.357798	0.0647011	327	117	210
	135	12	13	9	34	151		0.461774	0.0835032	327	151	176
	150	8	8	9	25	176		0.538226	0.0973282	327	176	151

## Sheet: Fig 2 - figure sup 1K
	ace2/ace2 cln3/cln3				ace2/ace2 CLN3/CLN3				ace2 cln3				ace2 CLN3
	Snowflake #	Longest segment	Longest perpendicular segment		Snowflake #	Longest segment	Longest perpendicular segment		Snowflake #	Longest segment	Longest perpendicular segment		Snowflake #	Longest segment	Longest perpendicular segment
	1	111.358	51.0944		1	42.5518	28.5816		1	28.138	13.3918		1	16.3835	10.0752
	2	30.2281	19.3981		2	23.1831	15.2335		2	15.3559	14.3857		2	11.1344	9.76166
	3	69.1483	55.7293		3	17.4832	8.32525		3	8.11881	5.5003		3	9.18712	9.04197
	4	32.7264	18.3688		4	42.4582	34.8868		4	11.9525	8.32025		4	14.2181	10.8621
	5	34.2064	14.6049		5	12.5667	11.2703		5	19.0698	18.1996		5	18.5051	12.3443
	6	33.728	11.3087		6	27.9144	18.5352		6	10.5827	10.5133		6	9.43906	6.192
	7	18.9173	9.41788		7	35.4017	33.5861		7	12.5925	7.8764		7	12.2087	10.4599
	8	26.5659	17.4646		8	14.9534	7.33487		8	13.1308	12.0689		8	10.563	7.8563
	9	34.4688	21.5		9	32.1251	27.105		9	10.3273	8.8325		9	10.1918	9.80739
	10	98.6472	76.0271		10	38.226	23.4327		10	26.6269	12.9161		10	7.98472	4.60848
	11	39.0203	30.2862		11	19.9078	8.67759		11	12.4624	12.3085		11	22.7385	17.4727
	12	81.4532	58.0708		12	66.3487	49.1767		12	11.4217	8.57438		12	16.5558	12.6657
	13	62.9779	38.2401		13	53.155	39.4843		13	8.40977	5.5485		13	13.3843	9.66898
	14	73.2495	58.7809		14	43.1209	42.5004		14	15.6956	11.8406		14	8.15868	5.289
	15	26.3968	21.6132		15	50.9164	28.4829		15	16.4519	11.8827		15	11.2534	9.46195
	16	85.9109	48.9792		16	68.4981	34.3053		16	23.2836	16.7223		16	14.8686	8.87104
	17	67.5912	52.4279		17	23.7479	16.5693		17	21.0377	14.2724		17	7.71955	7.32125
	18	72.2515	37.0266		18	17.9528	14.4492		18	11.8939	9.63018		18	9.69905	8.95598
	19	47.0231	42.9572		19	26.6556	17.8603		19	19.3882	14.0296		19	13.0443	10.7416
	20	100.312	40.4818		20	20.7305	8.05295		20	16.4362	15.3559		20	11.6847	9.94639
	21	41.4299	35.4645		21	27.8667	14.9662		21	11.9128	11.4752		21	10.3498	7.42507
	22	63.0004	44.58		22	38.5488	20.3055		22	14.24	9.87335		22	10.4689	6.48217
	23	36.5776	31.9756		23	52.9991	39.9387		23	21.1314	14.9181		23	12.7501	9.46283
	24	115.711	60.8022		24	26.619	22.2184		24	19.6097	14.5313		24	16.4157	13.6975
	25	60.8449	44.916		25	65.9044	40.1594		25	11.2696	6.13259		25	12.491	10.0328
	26	64.8081	47.4455		26	27.8021	13.505		26	19.7037	19.5659		26	16.8806	12.3712
	27	58.2325	55.9146		27	48.1741	43.9125		27	17.2328	10.3715		27	8.75729	4.79951
	28	73.6071	73.5261		28	14.7111	10.578		28	16.9034	13.1073		28	16.5201	13.468
	29	26.5455	24.3622		29	44.8321	23.4155		29	12.3146	9.25454		29	14.4997	12.5528
	30	93.568	57.4338		30	50.3332	24.2194		30	16.3275	9.36028		30	13.1003	10.3273
	31	19.3207	10.2326		31	44.9394	39.2576		31	21.2562	15.4569		31	10.3498	9.85817
	32	102.37	57.8744		32	21.9996	17.3901		32	16.6869	9.48654		32	15.093	7.3076
	33	49.9257	34.5598		33	15.6005	9.36117		33	26.1899	17.4169		33	9.03461	6.75866
	34	45.9807	21.3885		34	53.3408	25.9607		34	19.8258	14.5513		34	9.09702	6.94686
	35	57.2299	28.9205		35	74.1179	39.7255		35	12.6092	11.6415		35	9.74441	9.26288
	36	51.4618	46.3123		36	23.5427	13.4547		36	12.257	12.2421		36	15.6135	10.7332
	37	100.739	71.4085		37	16.4443	8.39194		37	9.44875	5.05739		37	14.197	10.3417
	38	52.4341	37.8269		38	28.0527	15.4628		38	19.4999	14.4532		38	11.5417	10.5882
	39	92.7729	35.0686		39	12.4697	10.4935		39	14.6012	13.2832		39	7.89328	7.01005
	40	53.7088	49.205		40	43.0265	30.1374		40	6.00093	5.26535		40	11.6422	9.36117
	41	68.3948	49.8977		41	31.8478	25.1102		41	23.7166	17.0168		41	12.3045	7.79356
	42	31.3491	15.6351		42	43.012	34.6697		42	7.92064	4.25504		42	11.9977	6.11765
	43	86.1528	46.374		43	15.5192	8.94483		43	10.8771	10.8513		43	8.33623	7.64155
	44	122.9	80.836		44	38.2224	25.3362		44	19.3174	14.5311		44	12.5767	11.2788
	45	66.599	47.4342		45	54.6395	30.2477		45	13.9728	12.2087		45	14.3706	8.74635
	46	29.2901	20.6311		46	46.019	32.3825		46	11.8245	10.8736		46	13.7707	10.5575
	47	45.0331	40.4741		47	61.4825	50.2948		47	10.8736	8.70439		47	11.7188	10.1747
	48	99.757	93.4124		48	29.5207	22.4152		48	12.3544	8.41444		48	9.97396	6.61054
	49	41.4941	24.5032		49	34.4903	25.9522		49	23.1385	14.5473		49	10.9771	6.72782
	50	74.609	49.2755		50	51.5868	27.5571		50	14.146	12.6549		50	13.6252	11.4221
	51	40.0122	29.4428		51	23.0434	13.9612		51	14.1389	9.87503		51	16.0327	13.5695
	52	81.7344	72.7107		52	41.0577	24.3853		52	16.2027	11.1456		52	12.4162	10.4235
	53	67.4057	43.4485		53	20.276	12.4015		53	13.0156	12.0358		53	17.1705	11.0387
	54	56.5994	41.446		54	21.1694	11.9497		54	17.7861	14.9779		54	17.3168	13.9608
	55	17.457	8.56564		55	32.7083	14.0715		55	16.645	14.4946		55	13.2267	8.36115
	56	69.954	52.72		56	54.0995	27.2117		56	19.2655	11.7913		56	8.8325	8.43348
	57	68.2488	60.1765		57	81.9177	48.7406		57	19.8446	14.6564		57	15.0245	13.6795
	58	43.5661	32.3852		58	24.0716	21.0175		58	14.0616	13.1889		58	14.6697	11.079
	59	116.873	60.6424		59	44.5575	38.9475		59	6.63441	6.579		59	13.4556	9.804
	60	38.6608	23.4027		60	40.1472	24.0664		60	13.5843	9.99646		60	13.7903	11.1426
	61	102.53	71.7512		61	42.0866	35.8251		61	12.9006	12.2111		61	10.2179	9.2889
	62	101.307	74.4875		62	35.4111	21.5893		62	16.0035	8.14643		62	10.7844	9.36028
	63	64.4145	52.0567		63	16.673	14.061		63	12.272	9.29158		63	15.1238	10.1771
	64	49.5093	48.3304		64	43.2158	38.7437		64	10.5662	9.73649		64	25.6972	16.1846
	65	18.9985	11.428		65	26.8348	22.5071		65	10.9764	8.65839		65	13.0851	9.23229
	66	57.4604	51.163		66	39.3235	37.8188		66	12.6565	11.696		66	15.246	9.06403
	67	41.5536	31.443		67	15.3125	13.9755		67	20.4862	17.122		67	13.0975	10.191
	68	61.2838	40.5782		68	26.559	16.5201		68	16.2707	14.1747		68	13.0034	8.8485
	69	52.5488	43.9093		69	13.0075	12.7076		69	14.9646	12.9006		69	14.123	10.7233
	70	92.8536	92.3562		70	18.5739	15.7428		70	18.7363	12.69		70	17.8319	13.6886
	71	40.4091	29.0985		71	20.2431	11.3849		71	12.3949	11.03		71	12.5044	10.3765
	72	46.428	37.5102		72	39.2656	21.6043		72	16.458	8.58795		72	9.33179	7.33827
	73	28.7226	25.1881		73	46.3261	42.7066		73	14.6249	12.4356		73	12.0187	9.94054
	74	25.4389	16.3911		74	41.624	30.0215		74	12.8444	9.59815		74	12.6532	8.08183
	75	51.2403	34.7355		75	14.2111	7.42843		75	20.3748	13.8325		75	14.2298	9.91371
	76	48.9368	34.1169		76	41.0199	31.3446		76	15.5871	10.6262		76	13.9421	7.91434
	77	67.9361	45.4551		77	21.2079	12.6716		77	27.1651	20.4334		77	10.7404	10.5693
	78	45.4231	30.201		78	19.4071	9.63968		78	15.7385	12.255		78	16.9305	8.78053
	79	76.7333	68.9737		79	30.2786	19.2837		79	13.7885	12.0662		79	14.1342	10.2715
	80	19.256	12.3328		80	24.476	24.127		80	18.8975	10.7349		80	14.0231	8.98381
	81	70.4899	59.6685		81	62.0767	46.0954		81	18.262	13.3189		81	11.8879	9.60162
	82	27.6208	16.8492		82	63.7683	34.1624		82	5.13576	4.75903		82	10.7752	9.69218
	83	26.4274	16.9449		83	43.3747	33.1209		83	14.849	11.8715		83	13.9111	9.01155
	84	82.6334	60.2795		84	21.7762	12.9161		84	15.7512	11.4168		84	14.9773	10.7775
	85	52.8562	45.4904		85	49.8176	25.2049		85	10.6039	6.1013		85	10.6509	8.76061
	86	133.849	86.0974		86	13.2211	11.2998		86	22.2277	16.9673		86	12.4356	9.49093
	87	118.009	100.579		87	52.5524	44.5558		87	24.6346	13.3489		87	10.4482	10.0396
	88	29.1283	16.8087		88	23.4821	23.0392		88	11.3079	8.65839		88	8.55106	6.00231
	89	73.197	49.2908		89	17.1744	11.6558		89	14.2209	10.0488		89	8.95598	4.75728
	90	50.6852	33.7046		90	15.0106	8.80325		90	12.8406	10.6564		90	12.7118	10.6063
	91	72.146	52.8807		91	42.7559	20.3542		91	13.3613	10.8122		91	10.4482	8.77295
	92	50.8445	30.4779		92	49.5785	40.3844		92	15.0709	14.4572		92	16.1945	12.0496
	93	50.0282	33.1337		93	23.6742	15.7496		93	13.9416	12.513		93	12.6446	9.93384
	94	77.0862	39.3567		94	26.1845	12.3685		94	11.6651	8.80325		94	13.0641	7.55284
	95	78.6935	51.4506		95	53.3151	39.0279		95	13.3769	11.4948		95	16.0676	10.7528
	96	104.108	92.9261		96	28.497	19.4888		96	8.93831	5.4806		96	11.3784	9.59815
	97	48.5441	39.7037		97	50.283	36.6481		97	16.6455	15.5128		97	10.8552	9.5782
	98	22.4834	9.95893		98	27.7206	20.8845		98	31.4763	13.7885		98	11.5331	9.18712
	99	30.4555	15.7634		99	10.4235	7.76683		99	13.8697	10.6063		99	13.6764	10.5811
	100	70.2169	54.5937		100	22.1659	16.5406		100	12.8877	11.1217		100	8.5384	6.19334
	101	23.4347	15.6346		101	55.6532	28.138		101	17.673	12.5369		101	11.4054	8.39987
	102	40.9223	25.528		102	29.0032	10.8029		102	11.1007	11.0429		102	9.66812	8.31325
	103	92.2259	80.2804		103	25.646	12.152		103	15.757	13.5916		103	10.4998	8.40086
	104	43.2214	25.1967		104	15.8313	6.58911		104	13.9535	10.3232		104	10.5275	7.69039
	105	46.8687	31.84		105	12.9528	9.8784		105	11.7624	11.4251		105	15.8979	9.12897
	106	61.9174	48.3589		106	17.3959	9.01155		106	19.5997	16.0144		106	14.6867	8.8485
	107	49.1726	37.2283		107	28.8329	14.2398		107	28.3266	17.6169		107	13.0316	9.52244
	108	65.0934	42.3801		108	15.5229	8.56661		108	10.2171	9.65089		108	10.4243	9.54338
	109	44.1071	37.5764		109	13.4241	7.02902		109	21.2913	14.4624		109	12.5714	7.63719
	110	84.2607	57.9854		110	18.7587	6.5992		110	12.7194	11.0429		110	9.92294	9.63449
	111	34.3433	27.1786		111	54.8384	40.7798		111	12.465	10.8592		111	14.882	9.32019
	112	32.8725	28.246		112	31.3297	18.6475		112	14.741	9.43818		112	8.96063	7.50532
	113	79.6999	69.6663		113	44.0487	29.8369		113	17.6051	13.9612		113	8.16887	7.54953
	114	67.7417	54.182		114	13.3076	6.95763		114	19.0998	14.2724		114	13.1206	8.96063
	115	42.5639	38.5072		115	14.1994	5.79783		115	17.5478	13.6837		115	10.0405	9.99396
	116	57.0106	41.2704		116	26.9391	20.8074		116	10.7349	10.1		116	8.48855	8.31325
	117	20.6356	14.1326		117	24.8766	23.1577		117	12.3847	10.5906		117	8.19226	6.55366
	118	51.7335	38.7981		118	44.8509	26.3375		118	16.2589	13.4207		118	14.3399	7.62083
	119	18.0692	12.0081		119	15.0023	8.05295		119	11.5619	9.46986		119	9.79466	7.99904
	120	67.4766	40.5938		120	22.7757	11.9023		120	11.9142	10.2309		120	15.093	11.6164
	121	83.7179	62.8611		121	19.5982	8.4325		121	14.5135	11.8434		121	16.5246	12.2553
	122	43.5669	33.9897		122	15.7449	9.57733		122	14.9912	12.9733		122	10.0925	8.76631
	123	87.7655	69.0395		123	20.5418	14.6697		123	11.5417	9.5782		123	14.5129	10.1983
	124	68.9669	53.2996		124	19.985	9.71277		124	9.14081	9.08878		124	11.6358	10.2041
	125	33.3095	25.6058		125	40.7362	26.1832		125	10.1771	7.37108		125	12.3584	9.80739
	126	47.1953	37.9729		126	18.1785	11.1389		126	26.0171	17.188		126	15.984	12.1733
	127	100.865	63.4487		127	46.8492	45.2315		127	16.6265	12.042		127	10.9862	10.898
	128	66.05	30.0877		128	28.4742	17.1876		128	20.8522	16.0976		128	9.42407	9.18168
	129	102.012	75.8155		129	20.5126	15.8675		129	17.624	12.278		129	9.09336	7.76683
	130	26.1129	10.32		130	23.0892	14.5604		130	12.2984	11.1419		130	11.4294	7.08444
	131	89.145	64.8314		131	57.9434	56.2228		131	9.34718	7.26535		131	9.82435	8.63529
	132	73.8511	57.7042		132	25.8158	22.779		132	13.6965	10.965		132	6.91445	6.19871
	133	128.522	57.7042		133	32.5172	10.4522		133	20.081	13.3026		133	8.54229	7.7925
	134	35.4841	35.1227		134	59.483	48.153		134	17.6169	10.6376		134	19.9379	12.6007
	135	57.6653	56.5348		135	21.3533	13.7903		135	20.2477	20.1062		135	9.31126	8.1229
	136	43.404	41.2111		136	16.9123	9.91959		136	11.8582	11.8406		136	10.2041	8.19226
	137	57.5659	44.7352		137	21.2913	11.2593		137	14.4261	13.2324		137	10.9011	6.21346
	138	25.8454	19.5682		138	16.2027	8.95598		138	11.6757	8.57632		138	11.6279	10.0189
	139	44.2723	26.558		139	39.0425	7.37108		139	10.2431	8.385		139	13.1763	9.12988
	140	69.8583	64.7051		140	37.2924	25.8032		140	13.2022	11.3784		140	12.6382	10.9764
	141	28.6705	18.9963		141	58.1884	47.6567		141	26.0902	15.7385		141	8.90754	8.39987
	142	44.0419	28.927		142	26.7556	13.8247		142	14.8837	11.9142		142	11.2289	8.1229
	143	32.506	31.7712		143	29.8127	20.1447		143	14.7563	12.5383		143	11.9859	9.00878
	144	67.145	63.6786		144	22.0012	19.6288		144	12.5157	10.8391		144	7.37108	6.58026
	145	33.9034	26.0018		145	29.0582	9.49443		145	13.6429	11.0308		145	10.5188	8.68909
	146	32.4837	30.352		146	21.6816	21.6816		146	14.319	11.7333		146	9.69819	7.10438
	147	37.0409	29.2696		147	20.8006	18.0605		147	14.4255	9.42407		147	8.02085	7.69904
	148	36.5198	29.0754		148	34.2533	24.8679		148	9.95308	7.11725		148	19.0016	17.2402
	149	28.0462	16.5801		149	40.2025	28.5699		149	13.347	11.5504		149	12.8599	11.1456
	150	83.4631	50.1855		150	50.347	25.0951		150	18.0526	11.773		150	9.74014	8.385
	151	37.8049	28.1365		151	33.9331	16.1958		151	8.64396	7.8859		151	9.48128	9.2485
	152	41.449	31.7916		152	44.8328	34.0504		152	15.6431	10.8429		152	12.4082	7.9489
	153	17.8659	9.57385		153	17.6051	12.7736		153	12.7912	8.1229		153	9.00878	6.39422
	154	45.9421	43.8602		154	56.0083	55.3386		154	11.8932	7.68173		154	15.4762	11.2644
	155	27.1896	15.6856		155	18.4988	12.2448		155	19.7475	16.4475		155	10.911	9.64054
	156	75.8553	69.553		156	32.7124	31.115		156	18.3656	12.7299		156	15.8381	8.00216
	157	63.208	39.0425		157	13.2123	10.6696		157	16.1472	13.3918		157	12.4906	12.3369
	158	60.2362	48.4383		158	28.8444	18.6158		158	15.4029	11.4025		158	7.998	6.32626
	159	28.6255	27.0303		159	12.8094	6.92887		159	24.1316	14.4503		159	11.6558	8.27211
	160	57.3201	33.7933		160	10.9285	6.34203		160	19.016	13.7068		160	18.47	11.3087
	161	50.1759	34.6643		161	50.987	35.9441		161	10.5788	8.78053		161	12.8396	9.93635
	162	70.3014	61.6783		162	28.3462	21.9323		162	14.8036	12.6768		162	10.7698	8.26506
	163	22.7307	18.7366		163	22.039	16.8583		163	11.9379	10.2041		163	13.5959	9.91371
	164	95.0617	70.8895		164	26.7453	17.2918		164	15.1827	13.2814		164	8.31725	7.28365
	165	14.0841	9.23049		165	17.7073	10.3618		165	16.7109	11.9518		165	9.13808	7.05737
	166	65.7046	56.2475		166	22.0269	5.74738		166	18.1172	10.3281		166	14.0758	9.933
	167	72.3084	70.6992		167	35.3378	24.5195		167	11.0767	10.8183		167	13.932	9.16263
	168	42.198	20.779		168	53.4927	30.4817		168	11.587	9.96895		168	7.388	6.6931
	169	57.0967	48.6824		169	21.5121	11.5957		169	11.8097	8.7919		169	8.80419	4.54439
	170	38.773	24.7213		170	38.5934	31.3977		170	12.0275	11.5071		170	11.8236	9.21696
	171	82.4103	48.0644		171	49.5807	45.4025		171	20.5309	13.9309		171	14.2444	10.0934
	172	58.9112	40.0154		172	30.4847	7.73247		172	12.5787	10.7318		172	10.8006	9.8885
	173	26.9807	10.9521		173	31.8805	28.2298		173	13.0806	12.2244		173	11.69	9.7102
	174	57.2039	41.6494		174	23.771	15.1722		174	17.3197	13.9708		174	17.3925	12.5137
	175	49.3883	45.8762		175	21.3069	14.6186		175	16.5653	12.8094		175	10.8483	8.07668
	176	57.3967	31.0035		176	18.5697	7.8975		176	16.1007	14.0189		176	11.8146	9.58861
	177	36.2156	31.5061		177	23.0564	16.5165		177	13.2644	10.6415		177	9.64054	8.08183
	178	17.6744	8.13621		178	16.5462	9.92546		178	11.106	8.93459		178	12.7762	9.05944
	179	18.2297	10.0388		179	58.3253	33.8425		179	12.6084	10.0958		179	10.9764	8.49639
	180	84.8253	75.872		180	25.2369	21.5908		180	15.1634	12.0461		180	8.10136	8.08183
	181	43.7171	21.8254		181	17.2769	12.7762		181	12.178	9.88261		181	12.4269	8.30123
	182	34.1994	18.6279		182	18.3343	12.6617		182	13.6332	7.82659		182	12.178	10.3401
	183	77.52	62.0266		183	62.0789	44.9877		183	19.1081	12.6657		183	12.2794	8.23178
	184	51.532	42.5264		184	14.4261	5.58139		184	15.0731	12.8645		184	8.6977	6.40859
	185	28.5029	20.9429		185	20.9044	18.2016		185	14.1994	10.0752		185	14.3196	11.6136
	186	44.8336	19.3057		186	23.078	14.8036		186	11.8638	9.8666		186	12.2122	11.7284
	187	49.7293	30.6372		187	40.4329	15.6447		187	29.4301	16.0043		187	10.5402	8.96063
	188	82.9498	80.0803		188	38.7346	24.8341		188	15.3244	13.7837		188	11.3784	9.54338
	189	62.0147	56.5467		189	40.1196	29.2492		189	16.5864	15.6191		189	16.0381	11.5568
	190	18.8856	15.959						190	13.5573	11.3285		190	10.4482	9.58775
	191	27.8117	18.5979						191	15.6197	10.1255		191	14.0657	7.95419
	192	27.5227	21.2885						192	13.5112	6.1502		192	9.19888	9.18078
	193	35.9283	30.3779						193	29.0559	19.1742		193	14.2835	8.77295
	194	28.555	19.4773						194	15.3315	11.4251		194	8.94204	6.41637
									195	11.2703	8.51791		195	16.0007	11.3937
									196	18.1817	14.4255		196	11.8792	11.0218
									197	15.5256	14.143		197	11.7899	9.58861
									198	12.3867	9.59815		198	12.3146	8.40977
									199	13.468	13.3189		199	13.8126	9.44787
									200	22.7834	20.3231		200	7.74215	6.29065
									201	13.9469	11.4839		201	13.216	8.59183
									202	15.2646	8.36513		202	9.36028	6.40469
									203	21.2008	14.7224		203	12.1958	9.69476
									204	16.5623	14.143		204	18.5711	8.67279
									205	11.2593	6.4616		205	10.3594	8.5384
									206	14.776	12.9		206	14.9779	12.2006
									207	15.5642	8.69674		207	7.48645	4.80081
									208	18.5872	10.3843		208	10.2828	8.09725
									209	15.0704	10.2163		209	8.78053	5.934
									210	11.4112	8.35617		210	10.2171	9.52331
									211	19.2729	11.6086		211	20.7886	14.3972
									212	10.9338	9.26737		212	14.7816	12.5449
									213	13.9702	10.1943		213	13.5603	9.81163
									214	14.5261	9.81163		214	15.3526	9.28979
									215	18.3253	12.2577		215	16.1928	10.9771
									216	23.607	16.9388		216	12.1157	8.385
									217	17.9278	16.4276		217	11.6672	8.46303
									218	15.3775	10.3401		218	14.4808	9.40374
									219	13.9565	12.2244		219	8.50422	7.92904
									220	20.3465	14.0982		220	11.4875	10.3273
									221	13.468	12.4437		221	14.2678	9.23229
									222	16.5407	14.3445		222	10.898	7.67089
									223	14.2514	11.2703		223	8.385	7.02073
									224	14.5633	10.8122		224	16.3438	10.4998
									225	11.9128	11.751		225	19.7163	16.4575
									226	19.9016	15.7068		226	12.1212	7.13593
									227	15.959	12.7057		227	15.216	10.7806
									228	13.2173	6.24152		228	11.4199	8.4246
									229	13.4259	11.3527		229	17.4456	10.5875
									230	11.5165	11.0406		230	12.7443	11.4752
									231	20.2797	13.9708		231	10.898	9.33536
									232	11.1007	7.35413		232	8.40086	6.59037
									233	15.9929	12.9232		233	14.974	9.75039
									234	19.1638	14.736		234	9.94639	9.89355
									235	16.4013	13.1637		235	12.3847	8.81704
									236	20.7152	18.58		236	10.2309	8.26506
									237	14.7083	12.0309		237	8.00736	7.48645
													238	9.18168	7.56824
													239	22.8461	13.1156
													240	17.4575	12.7266
													241	12.4804	9.20341
													242	7.51529	7.29734
													243	10.5283	9.82435
													244	9.63277	8.76915
													245	10.5882	9.46986
													246	12.2414	9.65089
													247	13.7613	11.5331
													248	13.9206	9.19527
													249	8.14745	6.11765
													250	10.2715	9.31394
													251	9.03092	7.48645
