# Supplementary material for: Constraints on the G1/S transition pathway may favor selection of multicellularity as a passenger phenotype
Source: eLife. 2026 Jun 18;15:RP109833. doi: 10.7554/eLife.109833 (PMC13278735; doi:10.7554/eLife.109833)
Supplement: Figure 2—source data 1. [file elife-109833-fig2-data1.xlsx]

## Sheet: Fig2A
		The linear regression is calculated on the proliferation phase after the exit of stationary phase.
		For each experiment, the grey cells of this Excel sheet indicate the time points taken into account to calculate the regression.
	ACE2/ACE2 cln3/cln3 -replicate 1					ACE2/ACE2 cln3/cln3 -replicate 2					ACE2/ACE2 cln3/cln3 -replicate 3					ACE2/ACE2 cln3/cln3 -replicate 4					ace2/ace2 cln3/cln3 -replicate 1					ace2/ace2 cln3/cln3 -replicate 2					ace2/ace2 cln3/cln3 -replicate 3					ace2/ace2 cln3/cln3 -replicate 4					ACE2/ACE2 CLN3/CLN3 -replicate 1					ACE2/ACE2 CLN3/CLN3 -replicate 2
	time (min)	optical density	O.D. normalized	log(OD normalized)	regression	time (min)	optical density	O.D. normalized	log(OD normalized)	regression	time (min)	optical density	O.D. normalized	log(OD normalized)	regression	time (min)	optical density	O.D. normalized	log(OD normalized)	regression	time (min)	optical density	O.D. normalized	log(OD normalized)	regression	time (min)	optical density	O.D. normalized	log(OD normalized)	regression	time (min)	optical density	O.D. normalized	log(OD normalized)	regression	time (min)	optical density	O.D. normalized	log(OD normalized)	regression	time (min)	optical density	O.D. normalized	log(OD normalized)	regression	time (min)	optical density	O.D. normalized	log(OD normalized)
	0	0.045	1	0	R²	0	0.044	1	0	R²	0	0.046	1	0	R²	0	0.046	1	0	R²	0	0.032	1	0	R²	0	0.033	1	0	R²	0	0.034	1	0	R²	0	0.031	1	0	R²	0	0.046	1	0	R²	0	0.041	1	0
	15	0.045	1	0	0.9894	15	0.044	1	0	0.9888	15	0.046	1	0	0.9835	15	0.046	1	0	0.9796	15	0.031	0.96875	-0.0137883	0.9948	15	0.033	1	0	0.9922	15	0.034	1	0	0.9821	15	0.03	0.967742	-0.0142404	0.9864	15	0.046	1	0	0.9935	15	0.041	1	0
	30	0.045	1	0	Slope	30	0.043	0.977273	-0.00998422	Slope	30	0.046	1	0	Slope	30	0.046	1	0	Slope	30	0.032	1	0	Slope	30	0.032	0.969697	-0.013364	Slope	30	0.034	1	0	Slope	30	0.032	1.03226	0.0137883	Slope	30	0.046	1	0	Slope	30	0.041	1	0
	45	0.044	0.977778	-0.00975984	0.003362	45	0.044	1	0	0.003283	45	0.046	1	0	0.003415	45	0.046	1	0	0.003383	45	0.034	1.0625	0.0263289	0.003338	45	0.033	1	0	0.003408	45	0.036	1.05882	0.0248236	0.003274	45	0.033	1.06452	0.0271522	0.003363	45	0.047	1.02174	0.00934003	0.00363	45	0.041	1	0
	60	0.044	0.977778	-0.00975984	X-intercept	60	0.044	1	0	X-intercept	60	0.047	1.02174	0.00934003	X-intercept	60	0.046	1	0	X-intercept	60	0.033	1.03125	0.013364	X-intercept	60	0.035	1.06061	0.0255541	X-intercept	60	0.038	1.11765	0.0483047	X-intercept	60	0.035	1.12903	0.0527064	X-intercept	60	0.048	1.04348	0.0184834	X-intercept	60	0.044	1.07317	0.0306688
	75	0.044	0.977778	-0.00975984	112.6	75	0.044	1	0	115.1	75	0.048	1.04348	0.0184834	113	75	0.046	1	0	118.2	75	0.034	1.0625	0.0263289	90.69	75	0.033	1	0	96.14	75	0.038	1.11765	0.0483047	94.68	75	0.036	1.16129	0.0649408	95.01	70	0.05	1.08696	0.0362122	89.65	70	0.046	1.12195	0.049974
	90	0.046	1.02222	0.00954532		90	0.043	0.977273	-0.00998422		90	0.048	1.04348	0.0184834		90	0.048	1.04348	0.0184834		90	0.034	1.0625	0.0263289		90	0.034	1.0303	0.012965		90	0.041	1.20588	0.0813049		90	0.036	1.16129	0.0649408		80	0.052	1.13043	0.0532455		80	0.047	1.14634	0.059314
	105	0.046	1.02222	0.00954532		105	0.045	1.02273	0.00975984		105	0.05	1.08696	0.0362122		105	0.049	1.06522	0.0274382		105	0.039	1.21875	0.0859146		105	0.035	1.06061	0.0255541		105	0.041	1.20588	0.0813049		105	0.038	1.22581	0.0884219		90	0.054	1.17391	0.0696359		90	0.048	1.17073	0.0684574
	115	0.048	1.06667	0.0280287		115	0.046	1.04545	0.0193052		120	0.053	1.15217	0.061518		120	0.05	1.08696	0.0362122		115	0.039	1.21875	0.0859146		115	0.039	1.18182	0.0725507		120	0.044	1.29412	0.111974		120	0.041	1.32258	0.121422		105	0.057	1.23913	0.093117		105	0.052	1.26829	0.103219
	125	0.051	1.13333	0.0543577		125	0.049	1.11364	0.0467434		135	0.056	1.21739	0.0854302		135	0.054	1.17391	0.0696359		125	0.043	1.34375	0.128318		125	0.046	1.39394	0.144244		135	0.047	1.38235	0.140619		135	0.042	1.35484	0.131888		120	0.06	1.30435	0.115393		120	0.055	1.34146	0.127579
	135	0.053	1.17778	0.0710634		135	0.051	1.15909	0.0641175		150	0.058	1.26087	0.10067		150	0.056	1.21739	0.0854302		135	0.045	1.40625	0.148063		135	0.046	1.39394	0.144244		150	0.051	1.5	0.176091		150	0.045	1.45161	0.161851		135	0.067	1.45652	0.163317		135	0.058	1.41463	0.150644
	150	0.058	1.28889	0.110215		150	0.056	1.27273	0.104735		165	0.064	1.3913	0.143422		165	0.06	1.30435	0.115393		150	0.052	1.625	0.210853		150	0.054	1.63636	0.21388		165	0.058	1.70588	0.231949		165	0.048	1.54839	0.18988		150	0.072	1.56522	0.194575		150	0.065	1.58537	0.200129
	165	0.062	1.37778	0.139179		165	0.06	1.36364	0.134699		180	0.074	1.6087	0.206474		180	0.066	1.43478	0.156786		165	0.054	1.6875	0.227244		165	0.056	1.69697	0.229674		180	0.058	1.70588	0.231949		180	0.058	1.87097	0.272066		180	0.091	1.97826	0.296284		180	0.083	2.02439	0.306294
	185	0.072	1.6	0.20412		185	0.069	1.56818	0.195396		195	0.079	1.71739	0.234869		195	0.075	1.63043	0.212303		185	0.062	1.9375	0.287242		185	0.061	1.84848	0.266816		195	0.065	1.91176	0.281434		195	0.064	2.06452	0.314818		210	0.115	2.5	0.39794		210	0.101	2.46341	0.391538
	210	0.085	1.88889	0.276206		210	0.082	1.86364	0.270361		210	0.085	1.84783	0.266661		210	0.083	1.80435	0.25632		210	0.077	2.40625	0.381341		210	0.073	2.21212	0.344809		210	0.071	2.08824	0.319779		210	0.071	2.29032	0.359897		240	0.148	3.21739	0.507504		240	0.134	3.26829	0.514321
	235	0.108	2.4	0.380211		235	0.096	2.18182	0.338819		225	0.099	2.15217	0.332877		225	0.097	2.1087	0.324014		235	0.091	2.84375	0.453891		235	0.09	2.72727	0.435729		225	0.082	2.41176	0.382335		225	0.078	2.51613	0.400733		270	0.193	4.19565	0.622799		270	0.168	4.09756	0.612525
	270	0.136	3.02222	0.480326		270	0.126	2.86364	0.456918		240	0.112	2.43478	0.38646		240	0.108	2.34783	0.370666		270	0.115	3.59375	0.555548		270	0.114	3.45455	0.538391		240	0.096	2.82353	0.450792		240	0.088	2.83871	0.453121		300	0.257	5.58696	0.747175		300	0.222	5.41463	0.733569
	300	0.186	4.13333	0.6163		300	0.168	3.81818	0.581857		270	0.148	3.21739	0.507504		270	0.136	2.95652	0.470781		300	0.153	4.78125	0.679541		300	0.158	4.78788	0.680143		270	0.115	3.38235	0.529219		270	0.107	3.45161	0.538022		330	0.342	7.43478	0.871268		330	0.304	7.41463	0.87009
	330	0.243	5.4	0.732394		330	0.223	5.06818	0.704852		300	0.194	4.21739	0.625044		300	0.182	3.95652	0.597314		330	0.196	6.125	0.787106		330	0.196	5.93939	0.773742		300	0.146	4.29412	0.632874		300	0.141	4.54839	0.657857		360	0.45	9.78261	0.990455		360	0.414	10.0976	1.00422
	360	0.313	6.95556	0.842332		360	0.288	6.54545	0.81594		335	0.272	5.91304	0.771811		335	0.246	5.34783	0.728177		360	0.255	7.96875	0.90139		360	0.262	7.93939	0.899787		335	0.202	5.94118	0.773872		335	0.193	6.22581	0.794196		390	0.6	13.0435	1.11539		390	0.512	12.4878	1.09649
	390	0.406	9.02222	0.955314		390	0.376	8.54545	0.931735		360	0.336	7.30435	0.863581		360	0.33	7.17391	0.855756		390	0.326	10.1875	1.00807		390	0.36	10.9091	1.03779		360	0.28	8.23529	0.915679		360	0.268	8.64516	0.936773		435	0.904	19.6522	1.29341		435	0.8	19.5122	1.29031
	435	0.618	13.7333	1.13778		435	0.566	12.8636	1.10936		390	0.436	9.47826	0.976729		390	0.414	9	0.954243		435	0.514	16.0625	1.20581		435	0.53	16.0606	1.20576		390	0.338	9.94118	0.997438		309	0.32	10.3226	1.01379
											435	0.66	14.3478	1.15679		435	0.626	13.6087	1.13382												435	0.512	15.0588	1.17779		435	0.492	15.871	1.2006
[truncated: 31 more columns]

## Sheet: Fig2C
		ACE2/ACE2 cln3Δ/cln3Δ						ACE2/ACE2 cln3Δ/cln3Δ
		replicate #1	replicate #2	replicate #3	total	Cummulative cells forming a bud		Budding index	SD	n	Contigency table
number of initial cells		102	101	117	320						bud	unbud
# of initial cells forming a first bud at t=	60	0	0	0	0	0		0	0	320	0	320
	75	0	0	0	0	0		0	0	320	0	320
	90	0	0	0	0	0		0	0	320	0	320
	105	0	0	0	0	0		0	0	320	0	320
	120	0	0	0	0	0		0	0	320	0	320
	135	0	0	0	0	0		0	0	320	0	320
	150	0	0	0	0	0		0	0	320	0	320
	165	2	1	1	4	4		0.0125	0.00223607	320	4	316
	180	4	0	1	5	9		0.028125	0.00503115	320	9	311
	195	16	2	6	24	33		0.103125	0.0184476	320	33	287
	210	5	1	7	13	46		0.14375	0.0257148	320	46	274
	225	12	2	6	20	66		0.20625	0.0368951	320	66	254
	240	8	11	14	33	99		0.309375	0.0553427	320	99	221
		ace2/ace2 cln3Δ/cln3Δ						ace2/ace2 cln3Δ/cln3Δ
		replicate #1	replicate #2	replicate #3	total	Cummulative cells forming a bud		Budding index	SD	n	Contigency table
number of initial cells		111	102	108	321						bud	unbud
# of cell forming a first bud at t=	60	0	0	0	0	0		0	0	321	0	321
	75	0	0	0	0	0		0	0	321	0	321
	90	1	0	0	1	1		0.00311526	0.000558146	321	1	320
	105	0	0	0	0	1		0.00311526	0.000558146	321	1	320
	120	1	0	0	1	2		0.00623053	0.00111629	321	2	319
	135	4	0	0	4	6		0.0186916	0.00334887	321	6	315
	150	10	1	2	13	19		0.05919	0.0106048	321	19	302
	165	8	3	4	15	34		0.105919	0.0189769	321	34	287
	180	11	5	6	22	56		0.174455	0.0312562	321	56	265
	195	11	7	8	26	82		0.255452	0.0457679	321	82	239
	210	10	15	4	29	111		0.345794	0.0619542	321	111	210
	225	6	10	8	24	135		0.420561	0.0753497	321	135	186
	240	9	8	10	27	162		0.504673	0.0904196	321	162	159

## Sheet: Fig2D
		ACE2 cln3Δ						ACE2 cln3Δ
		replicate #1	replicate #2	replicate #3	total	Cummulative cells forming a bud		Budding index	SD	n	Contigency table
number of initial cells		122	109	57	288						bud	unbud
# of initial cells forming a first bud at t=	60	0	0	0	0	0		0	0	288	0	288
	75	0	0	0	0	0		0	0	288	0	288
	90	0	0	0	0	0		0	0	288	0	288
	105	0	0	0	0	0		0	0	288	0	288
	120	0	2	2	4	4		0.0138889	0.00235702	288	4	284
	135	0	0	1	1	5		0.0173611	0.00294628	288	5	283
	150	1	2	1	4	9		0.03125	0.0053033	288	9	279
	165	2	5	1	8	17		0.0590278	0.0100173	288	17	271
	180	5	7	3	15	32		0.111111	0.0188562	288	32	256
	195	2	10	2	14	46		0.159722	0.0271058	288	46	242
	210	8	17	2	27	73		0.253472	0.0430157	288	73	215
	225	6	5	3	14	87		0.302083	0.0512652	288	87	201
	240	13	14	7	34	121		0.420139	0.0712999	288	121	167
		ace2 cln3Δ						ace2 cln3Δ
		replicate #1	replicate #2	replicate #3	total	Cummulative cells forming a bud		Budding index	SD	n	Contigency table
number of initial cells		134	102	57	293						bud	unbud
# of cell forming a first bud at t=	60	0	0	0	0	0		0	0	293	0	293
	75	0	3	0	3	3		0.0102389	0.00175262	293	3	290
	90	0	4	3	7	10		0.0341297	0.00584206	293	10	283
	105	1	12	1	14	24		0.0819113	0.0140209	293	24	269
	120	0	12	4	16	40		0.136519	0.0233682	293	40	253
	135	3	6	2	11	51		0.174061	0.0297945	293	51	242
	150	1	7	4	12	63		0.215017	0.036805	293	63	230
	165	3	10	4	17	80		0.273038	0.0467365	293	80	213
	180	9	6	5	20	100		0.341297	0.0584206	293	100	193
	195	9	8	4	21	121		0.412969	0.070689	293	121	172
	210	8	5	10	23	144		0.491468	0.0841257	293	144	149
	225	15	3	2	20	164		0.559727	0.0958098	293	164	129
	240	23	5	0	28	192		0.65529	0.112168	293	192	101

## Sheet: Fig2E
	CONSTANT PROLIFERATION										CULTURES ALTERNING CYCLES OF PROLIFERATION AND STATIONNARY PHASES
	CLN3 background	Starting point				70 generations					CLN3 background	Starting point				70 generations
		1-2 cells	3 cells	4+ cells	tot	1-2 cells	3 cells	4+ cells	tot			1-2 cells	3 cells	4+ cells	tot	1-2 cells	3 cells	4+ cells	tot
	Competiton #1	102	7	117	226	138	5	148	291		Competiton #1	189	14	196	399	96	30	126	252
		0.451327	0.0309735	0.517699		0.474227	0.0171821	0.508591				0.473684	0.0350877	0.491228		0.380952	0.119048	0.5
	Competiton #2	111	8	115	234	143	13	139	295		Competiton #2	182	23	202	407	110	27	139	276
		0.474359	0.034188	0.491453		0.484746	0.0440678	0.471186				0.447174	0.0565111	0.496314		0.398551	0.0978261	0.503623
	Competiton #3	118	8	121	247	117	14	139	270		Competiton #3	253	47	295	595	107	23	133	263
		0.477733	0.0323887	0.489879		0.433333	0.0518519	0.514815				0.42521	0.0789916	0.495798		0.406844	0.0874525	0.505703
	% of each type of entity	45.1327	3.09735	51.7699		47.4227	1.71821	50.8591			Competiton #4	206	51	249	506	125	16	143	284
		47.4359	3.4188	49.1453		48.4746	4.40678	47.1186				0.407115	0.100791	0.492095		0.440141	0.056338	0.503521
		47.7733	3.23887	48.9879		43.3333	5.18519	51.4815			% of each type of entity	47.3684	3.50877	49.1228		38.0952	11.9048	50
	Mean	46.7806	3.25167	49.9677		46.4102	3.77006	49.8197				44.7174	5.65111	49.6314		39.8551	9.78261	50.3623
	Contingency table	354		353		430		426				42.521	7.89916	49.5798		40.6844	8.74525	50.5703
												40.7115	10.0791	49.2095		44.0141	5.6338	50.3521
											Mean	43.8296	6.78452	49.3859		40.6622	9.01661	50.3212
											Contingency table	965		942		534		541
	CONSTANT PROLIFERATION										CULTURES ALTERNING CYCLES OF PROLIFERATION AND STATIONNARY PHASES
	cln3∆ background	Starting point				70 generations					cln3∆ background	Starting point				70 generations
		1-2 cells	3 cells	4+ cells	tot	1-2 cells	3 cells	4+ cells	tot			1-2 cells	3 cells	4+ cells	tot	1-2 cells	3 cells	4+ cells	tot
	Competiton #1	108	2	98	208	146	12	149	307		Competiton #1	156	48	201	405	32	18	228	278
		0.519231	0.00961538	0.471154		0.47557	0.0390879	0.485342				0.385185	0.118519	0.496296		0.115108	0.0647482	0.820144
	Competiton #2	104	7	108	219	117	4	133	254		Competiton #2	162	55	207	424	31	21	238	290
		0.474886	0.0319635	0.493151		0.46063	0.015748	0.523622				0.382075	0.129717	0.488208		0.106897	0.0724138	0.82069
	Competiton #3	102	4	114	220	124	11	124	259		Competiton #3	172	74	238	484	33	22	250	305
		0.463636	0.0181818	0.518182		0.478764	0.042471	0.478764				0.355372	0.152893	0.491736		0.108197	0.0721311	0.819672
	% of each type of entity	51.9231	0.961538	47.1154		47.557	3.90879	48.5342			Competiton #4	216	61	267	544	24	17	250	291
		47.4886	3.19635	49.3151		46.063	1.5748	52.3622				0.397059	0.112132	0.490809		0.0824742	0.0584192	0.859107
		46.3636	1.81818	51.8182		47.8764	4.2471	47.8764			% of each type of entity	38.5185	11.8519	49.6296		11.5108	6.47482	82.0144
	Mean	48.5918	1.99202	49.4162		47.1655	3.24357	49.591				38.2075	12.9717	48.8208		10.6897	7.24138	82.069
	Contingency table	327		320		414		406				35.5372	15.2893	49.1736		10.8197	7.21311	81.9672
												39.7059	11.2132	49.0809		8.24742	5.84192	85.9107
											Mean	37.9923	12.8315	49.1762		10.3169	6.69281	82.9903
											Contingency table	944		913		198		966

## Sheet: Fig 2F
		The linear regression is calculated on the proliferation phase after the exit of stationary phase.
		For each experiment, the grey cells of this Excel sheet indicate the time points taken into account to calculate the regression.
	ACE2/ACE2 cln3/cln3 -replicate 1					ACE2/ACE2 cln3/cln3 -replicate 2					ACE2/ACE2 cln3/cln3 -replicate 3					ace2/ace2 cln3/cln3 -replicate 1					ace2/ace2 cln3/cln3 -replicate 2					ace2/ace2 cln3/cln3 -replicate 3					ACE2/ACE2 CLN3/CLN3 -replicate 1					ACE2/ACE2 CLN3/CLN3 -replicate 2					ACE2/ACE2 CLN3/CLN3 -replicate 3					ace2/ace2 CLN3/CLN3 -replicate 1
	time (min)	optical density	O.D. normalized	log(OD normalized)	regression	time (min)	optical density	O.D. normalized	log(OD normalized)	regression	time (min)	optical density	O.D. normalized	log(OD normalized)	regression	time (min)	optical density	O.D. normalized	log(OD normalized)	regression	time (min)	optical density	O.D. normalized	log(OD normalized)	regression	time (min)	optical density	O.D. normalized	log(OD normalized)	regression	time (min)	optical density	O.D. normalized	log(OD normalized)	regression	time (min)	optical density	O.D. normalized	log(OD normalized)	regression	time (min)	optical density	O.D. normalized	log(OD normalized)	regression	time (min)	optical density	O.D. normalized	log(OD normalized)
	0	0.045	1	0	R²	0	0.044	1	0	R²	0	0.05	1	0	R²	0	0.027	1	0	R²	0	0.027	1	0	R²	0	0.033	1	0	R²	0	0.09	1	0	R²	0	0.084	1	0	R²	0	0.1	1	0	R²	0	0.067	1	0
	30	0.045	1	0	0.9948	30	0.043	0.977273	-0.00998422	0.9954	30	0.049	0.98	-0.00877392	0.9963	30	0.027	1	0	0.9956	30	0.027	1	0	0.9974	30	0.033	1	0	0.9933	60	0.09	1	0	0.9883	60	0.082	0.97619	-0.0104654	0.9905	60	0.103	1.03	0.0128372	0.9935	60	0.07	1.04478	0.0190232
	45	0.044	0.977778	-0.00975984	Slope	45	0.044	1	0	Slope	60	0.048	0.96	-0.0177288	Slope	45	0.027	1	0	Slope	45	0.027	1	0	Slope	60	0.034	1.0303	0.012965	Slope	90	0.092	1.02222	0.00954532	Slope	90	0.084	1	0	Slope	90	0.101	1.01	0.00432137	Slope	90	0.072	1.07463	0.0312577
	60	0.045	1	0	0.003289	60	0.044	1	0	0.003279	90	0.049	0.98	-0.00877392	0.0034	60	0.031	1.14815	0.0599979	0.003362	60	0.033	1.22222	0.0871502	0.003438	90	0.036	1.09091	0.0377886	0.003393	120	0.093	1.03333	0.0142404	0.002157	120	0.086	1.02381	0.0102192	0.002199	120	0.101	1.01	0.00432137	0.001828	120	0.07	1.04478	0.0190232
	75	0.044	0.977778	-0.00975984	X-intercept	75	0.043	0.977273	-0.00998422	X-intercept	120	0.05	1	0	X-intercept	75	0.031	1.14815	0.0599979	X-intercept	75	0.033	1.22222	0.0871502	X-intercept	120	0.036	1.09091	0.0377886	X-intercept	150	0.09	1	0	X-intercept	150	0.09	1.07143	0.0299632	X-intercept	150	0.098	0.98	-0.00877392	X-intercept	150	0.068	1.01493	0.00643411
	90	0.045	1	0	328.5	90	0.044	1	0	341.5	150	0.049	0.98	-0.00877392	338.1	90	0.033	1.22222	0.0871502	272.7	90	0.034	1.25926	0.100115	282.5	150	0.038	1.15152	0.0612697	292.5	180	0.089	0.988889	-0.0048525	195.8	180	0.084	1	0	187.5	180	0.113	1.13	0.0530784	163	180	0.076	1.13433	0.0547388
	105	0.045	1	0		105	0.045	1.02273	0.00975984		165	0.049	0.98	-0.00877392		105	0.035	1.2963	0.112704		105	0.035	1.2963	0.112704		165	0.039	1.18182	0.0725507		210	0.11	1.22222	0.0871502		210	0.098	1.16667	0.0669468		210	0.13	1.3	0.113943		210	0.08	1.19403	0.0770152
	120	0.046	1.02222	0.00954532		120	0.046	1.04545	0.0193052		180	0.05	1	0		120	0.036	1.33333	0.124939		120	0.036	1.33333	0.124939		180	0.039	1.18182	0.0725507		240	0.108	1.2	0.0791812		240	0.112	1.33333	0.124939		240	0.141	1.41	0.149219		240	0.092	1.37313	0.137713
	135	0.045	1	0		135	0.046	1.04545	0.0193052		195	0.05	1	0		135	0.036	1.33333	0.124939		135	0.036	1.33333	0.124939		195	0.04	1.21212	0.0835461		270	0.118	1.31111	0.117639		270	0.128	1.52381	0.182931		270	0.152	1.52	0.181844		270	0.096	1.43284	0.156196
	150	0.046	1.02222	0.00954532		150	0.045	1.02273	0.00975984		210	0.051	1.02	0.00860017		150	0.036	1.33333	0.124939		150	0.036	1.33333	0.124939		210	0.042	1.27273	0.104735		300	0.148	1.64444	0.216019		300	0.14	1.66667	0.221849		300	0.168	1.68	0.225309		300	0.115	1.71642	0.234623
	165	0.046	1.02222	0.00954532		165	0.046	1.04545	0.0193052		225	0.051	1.02	0.00860017		165	0.036	1.33333	0.124939		165	0.037	1.37037	0.136838		225	0.043	1.30303	0.114955		330	0.164	1.82222	0.260601		330	0.153	1.82143	0.260412		330	0.189	1.89	0.276462		330	0.13	1.9403	0.287869
	180	0.046	1.02222	0.00954532		180	0.047	1.06818	0.0286452		240	0.052	1.04	0.0170333		180	0.036	1.33333	0.124939		180	0.037	1.37037	0.136838		240	0.045	1.36364	0.134699		360	0.213	2.36667	0.374137		360	0.208	2.47619	0.393784		360	0.231	2.31	0.363612		360	0.146	2.1791	0.338278
	195	0.047	1.04444	0.0188853		195	0.047	1.06818	0.0286452		255	0.053	1.06	0.0253059		195	0.036	1.33333	0.124939		195	0.037	1.37037	0.136838		255	0.046	1.39394	0.144244		390	0.24	2.66667	0.425969		390	0.256	3.04762	0.483961		390	0.264	2.64	0.421604		390	0.163	2.43284	0.386113
	210	0.048	1.06667	0.0280287		210	0.049	1.11364	0.0467434		270	0.054	1.08	0.0334238		210	0.04	1.48148	0.170696		210	0.039	1.44444	0.159701		270	0.047	1.42424	0.153584		420	0.278	3.08889	0.489802		420	0.271	3.22619	0.50869		420	0.301	3.01	0.478566		420	0.172	2.56716	0.409454
	225	0.049	1.08889	0.0369836		225	0.05	1.13636	0.0555173		285	0.056	1.12	0.049218		225	0.041	1.51852	0.18142		225	0.041	1.51852	0.18142		285	0.047	1.42424	0.153584		450	0.323	3.58889	0.55496		450	0.325	3.86905	0.587604		450	0.342	3.42	0.534026		450	0.193	2.8806	0.459483
	240	0.049	1.08889	0.0369836		240	0.05	1.13636	0.0555173		300	0.057	1.14	0.0569049		240	0.041	1.51852	0.18142		240	0.041	1.51852	0.18142		300	0.052	1.57576	0.197489		480	0.362	4.02222	0.604466		480	0.356	4.2381	0.627171		480	0.386	3.86	0.586587		480	0.239	3.56716	0.552323
	255	0.05	1.11111	0.0457575		255	0.05	1.13636	0.0555173		315	0.058	1.16	0.064458		255	0.044	1.62963	0.212089		255	0.046	1.7037	0.231394		315	0.053	1.60606	0.205762		510	0.445	4.94444	0.694118		510	0.434	5.16667	0.71321		510	0.428	4.28	0.631444		510	0.269	4.01493	0.603677
	270	0.052	1.15556	0.0627908		270	0.05	1.13636	0.0555173		330	0.061	1.22	0.0863598		270	0.044	1.62963	0.212089		270	0.048	1.77778	0.249877		330	0.054	1.63636	0.21388		540	0.489	5.43333	0.735066		540	0.502	5.97619	0.776424		540	0.486	4.86	0.686636		540	0.302	4.50746	0.653932
	285	0.053	1.17778	0.0710634		285	0.052	1.18182	0.0725507		345	0.065	1.3	0.113943		285	0.045	1.66667	0.221849		285	0.048	1.77778	0.249877		345	0.059	1.78788	0.252338
	300	0.056	1.24444	0.0949755		300	0.054	1.22727	0.0889411		360	0.068	1.36	0.133539		300	0.047	1.74074	0.240734		300	0.049	1.81481	0.258832		360	0.063	1.90909	0.280827
	315	0.058	1.28889	0.110215		315	0.057	1.29545	0.112422		380	0.075	1.5	0.176091		315	0.049	1.81481	0.258832		315	0.052	1.92593	0.28464		380	0.071	2.15152	0.332744
	330	0.061	1.35556	0.132117		330	0.06	1.36364	0.134699		400	0.084	1.68	0.225309		330	0.056	2.07407	0.316824		330	0.056	2.07407	0.316824		400	0.083	2.51515	0.400564
	345	0.066	1.46667	0.166331		345	0.063	1.43182	0.155888		420	0.101	2.02	0.305351		345	0.058	2.14815	0.332064		345	0.058	2.14815	0.332064		420	0.096	2.90909	0.463757
	360	0.071	1.57778	0.198046		360	0.067	1.52273	0.182622		450	0.124	2.48	0.394452		360	0.065	2.40741	0.38155		360	0.062	2.2963	0.361028		450	0.118	3.57576	0.553368
	380	0.076	1.68889	0.227601		380	0.073	1.65909	0.21987		480	0.145	2.9	0.462398		380	0.071	2.62963	0.419895		380	0.067	2.48148	0.394711		480	0.138	4.18182	0.621365
	400	0.082	1.82222	0.260601		400	0.08	1.81818	0.259637		510	0.183	3.66	0.563481		400	0.08	2.96296	0.471726		400	0.076	2.81481	0.44945		510	0.172	5.21212	0.717015
	420	0.096	2.13333	0.329059		420	0.085	1.93182	0.285966		540	0.238	4.76	0.677607		420	0.092	3.40741	0.532424		420	0.085	3.14815	0.498055		540	0.208	6.30303	0.799549
	450	0.119	2.64444	0.422334		450	0.104	2.36364	0.373581		570	0.304	6.08	0.783904		450	0.108	4	0.60206		450	0.104	3.85185	0.58567		570	0.292	8.84848	0.946869
	480	0.138	3.06667	0.486667		480	0.122	2.77273	0.442907		600	0.376	7.52	0.876218		480	0.129	4.77778	0.679226		480	0.123	4.55556	0.658541		600	0.352	10.6667	1.02803
	510	0.169	3.75556	0.574674		510	0.15	3.40909	0.532639		630	0.48	9.6	0.982271		510	0.156	5.77778	0.761761		510	0.153	5.66667	0.753328		630	0.448	13.5758	1.13276
	540	0.212	4.71111	0.673123		540	0.189	4.29545	0.633009		660	0.664	13.28	1.1232		540	0.204	7.55556	0.878266		540	0.203	7.51852	0.876132		660	0.636	19.2727	1.28494
	570	0.258	5.73333	0.758407		570	0.238	5.40909	0.733124		680	0.74	14.8	1.17026		570	0.27	10	1		570	0.266	9.85185	0.993518		680	0.695	21.0606	1.32347
	600	0.356	7.91111	0.898237		600	0.296	6.72727	0.827839							600	0.352	13.037	1.11518		600	0.34	12.5926	1.10012
	630	0.436	9.68889	0.986274		630	0.378	8.59091	0.934039							630	0.424	15.7037	1.196		630	0.426	15.7778	1.19805
	645	0.502	11.1556	1.04749		645	0.44	10	1							645	0.482	17.8519	1.25168		645	0.472	17.4815	1.24258
	660	0.572	12.7111	1.10418		660	0.516	11.7273	1.0692							660	0.56	20.7407	1.31682		660	0.554	20.5185	1.31215
	680	0.676	15.0222	1.17673		680	0.596	13.5455	1.13179							680	0.638	23.6296	1.37346		680	0.624	23.1111	1.36382
[truncated: 11 more columns]

## Sheet: Fig2G
	DILUTION EVERY 5 DAYS
	CLN3 background	Point 0				Point 1				Point 2				Point 3				Point 4
		1-2 cells	3 cells	4+ cells	tot	1-2 cells	3 cells	4+ cells	tot	1-2 cells	3 cells	4+ cells	tot	1-2 cells	3 cells	4+ cells	tot	1-2 cells	3 cells	4+ cells	tot
	Competiton #1	208	39	243	490	114	17	135	266	127	8	123	258	124	7	126	257	113	7	128	248
		0.42449	0.0795918	0.495918		0.428571	0.0639098	0.507519		0.492248	0.0310078	0.476744		0.48249	0.0272374	0.490272		0.455645	0.0282258	0.516129
	Competiton #2	133	22	150	305	100	6	102	208	118	7	137	262	108	12	128	248	121	7	116	244
		0.436066	0.0721311	0.491803		0.480769	0.0288462	0.490385		0.450382	0.0267176	0.522901		0.435484	0.0483871	0.516129		0.495902	0.0286885	0.47541
	Competiton #3	163	22	189	374	122	4	118	244	102	13	111	226	127	6	127	260	110	8	112	230
		0.435829	0.0588235	0.505348		0.5	0.0163934	0.483607		0.451327	0.0575221	0.49115		0.488462	0.0230769	0.488462		0.478261	0.0347826	0.486957
	% of each type of entity	42.449	7.95918	49.5918		42.8571	6.39098	50.7519		49.2248	3.10078	47.6744		48.249	2.72374	49.0272		45.5645	2.82258	51.6129
		43.6066	7.21311	49.1803		48.0769	2.88462	49.0385		45.0382	2.67176	52.2901		43.5484	4.83871	51.6129		49.5902	2.86885	47.541
		43.5829	5.88235	50.5348		50	1.63934	48.3607		45.1327	5.75221	49.115		48.8462	2.30769	48.8462		47.8261	3.47826	48.6957
	Mean	43.2128	7.01822	49.769		46.978	3.63831	49.3837		46.4652	3.84158	49.6932		46.8812	3.29005	49.8288		47.6603	3.05656	49.2832
	Contingency table	587		582		363		355		375		371		384		381		366		356
	DILUTION EVERY 5 DAYS
	cln3∆ background	Point 0				Point 1				Point 2				Point 3				Point 4
		1-2 cells	3 cells	4+ cells	tot	1-2 cells	3 cells	4+ cells	tot	1-2 cells	3 cells	4+ cells	tot	1-2 cells	3 cells	4+ cells	tot	1-2 cells	3 cells	4+ cells	tot
	Competiton #1	170	19	188	377	98	5	142	245	65	10	199	274	33	13	205	251	21	3	206	230
		0.450928	0.0503979	0.498674		0.4	0.0204082	0.579592		0.237226	0.0364964	0.726277		0.131474	0.0517928	0.816733		0.0913043	0.0130435	0.895652
	Competiton #2	164	15	169	348	91	11	138	240	59	11	203	273	36	3	216	255	17	5	220	242
		0.471264	0.0431034	0.485632		0.379167	0.0458333	0.575		0.216117	0.040293	0.74359		0.141176	0.0117647	0.847059		0.0702479	0.0206612	0.909091
	Competiton #3	141	11	156	308	76	9	183	268	34	13	231	278	24	7	256	287	19	3	238	260
		0.457792	0.0357143	0.506494		0.283582	0.0335821	0.682836		0.122302	0.0467626	0.830935		0.0836237	0.0243902	0.891986		0.0730769	0.0115385	0.915385
	% of each type of entity	45.0928	5.03979	49.8674		40	2.04082	57.9592		23.7226	3.64964	72.6277		13.1474	5.17928	81.6733		9.13043	1.30435	89.5652
		47.1264	4.31034	48.5632		37.9167	4.58333	57.5		21.6117	4.0293	74.359		14.1176	1.17647	84.7059		7.02479	2.06612	90.9091
		45.7792	3.57143	50.6494		28.3582	3.35821	68.2836		12.2302	4.67626	83.0935		8.36237	2.43902	89.1986		7.30769	1.15385	91.5385
	Mean	45.9995	4.30719	49.6933		35.425	3.32745	61.2476		19.1882	4.1184	76.6934		11.8758	2.93159	85.1926		7.82097	1.5081	90.6709
	Contingency table	520		513		290		463		192		633		116		677		68		664
	DILUTION EVERY 2 DAYS
	CLN3 background	Point 0				Point 1				Point 2				Point 3				Point 4
		1-2 cells	3 cells	4+ cells	tot	1-2 cells	3 cells	4+ cells	tot	1-2 cells	3 cells	4+ cells	tot	1-2 cells	3 cells	4+ cells	tot	1-2 cells	3 cells	4+ cells	tot
	Competiton #1	189	14	196	399	117	32	144	293	103	28	128	259	98	36	135	269	104	25	123	252
		0.473684	0.0350877	0.491228		0.399317	0.109215	0.491468		0.397683	0.108108	0.494208		0.364312	0.133829	0.501859		0.412698	0.0992063	0.488095
	Competiton #2	182	23	202	407	91	39	129	259	115	26	141	282	92	28	119	239	111	21	132	264
		0.447174	0.0565111	0.496314		0.351351	0.150579	0.498069		0.407801	0.0921986	0.5		0.384937	0.117155	0.497908		0.420455	0.0795455	0.5
	Competiton #3	253	47	295	595	107	21	125	253	119	23	137	279	102	22	127	251	110	20	126	256
		0.42521	0.0789916	0.495798		0.422925	0.083004	0.494071		0.426523	0.0824373	0.491039		0.406375	0.0876494	0.505976		0.429688	0.078125	0.492188
	Competiton #4	206	51	249	506	104	36	136	276	122	23	147	292	104	29	136	269	100	27	132	259
		0.407115	0.100791	0.492095		0.376812	0.130435	0.492754		0.417808	0.0787671	0.503425		0.386617	0.107807	0.505576		0.3861	0.104247	0.509653
	% of each type of entity	47.3684	3.50877	49.1228		39.9317	10.9215	49.1468		39.7683	10.8108	49.4208		36.4312	13.3829	50.1859		41.2698	9.92063	48.8095
		44.7174	5.65111	49.6314		35.1351	15.0579	49.8069		40.7801	9.21986	50		38.4937	11.7155	49.7908		42.0455	7.95455	50
		42.521	7.89916	49.5798		42.2925	8.3004	49.4071		42.6523	8.24373	49.1039		40.6375	8.76494	50.5976		42.9688	7.8125	49.2188
		40.7115	10.0791	49.2095		37.6812	13.0435	49.2754		41.7808	7.87671	50.3425		38.6617	10.7807	50.5576		38.61	10.4247	50.9653
	Mean	43.8296	6.78452	49.3859		38.7601	11.8308	49.409		41.2454	9.03778	49.7168		38.556	11.161	50.283		41.2235	9.0281	49.7484
	Contingency table	965		942		547		534		559		553		511		517		518		513
	DILUTION EVERY 2 DAYS
	cln3∆ background	Point 0				Point 1				Point 2				Point 3				Point 4
		1-2 cells	3 cells	4+ cells	tot	1-2 cells	3 cells	4+ cells	tot	1-2 cells	3 cells	4+ cells	tot	1-2 cells	3 cells	4+ cells	tot	1-2 cells	3 cells	4+ cells	tot
	Competiton #1	156	48	201	405	91	24	147	262	96	28	156	280	94	29	180	303	73	34	208	315
		0.385185	0.118519	0.496296		0.347328	0.0916031	0.561069		0.342857	0.1	0.557143		0.310231	0.0957096	0.594059		0.231746	0.107937	0.660317
	Competiton #2	162	55	207	424	93	23	140	256	92	23	160	275	107	33	203	343	85	33	217	335
		0.382075	0.129717	0.488208		0.363281	0.0898438	0.546875		0.334545	0.0836364	0.581818		0.311953	0.0962099	0.591837		0.253731	0.0985075	0.647761
	Competiton #3	172	74	238	484	102	35	144	281	94	32	170	296	100	30	196	326	78	24	220	322
		0.355372	0.152893	0.491736		0.362989	0.124555	0.512456		0.317568	0.108108	0.574324		0.306748	0.0920245	0.601227		0.242236	0.0745342	0.68323
	Competiton #4	216	61	267	544	104	24	156	284	88	36	178	302	75	23	180	278	83	15	217	315
		0.397059	0.112132	0.490809		0.366197	0.084507	0.549296		0.291391	0.119205	0.589404		0.269784	0.0827338	0.647482		0.263492	0.047619	0.688889
	% of each type of entity	38.5185	11.8519	49.6296		34.7328	9.16031	56.1069		34.2857	10	55.7143		31.0231	9.57096	59.4059		23.1746	10.7937	66.0317
		38.2075	12.9717	48.8208		36.3281	8.98438	54.6875		33.4545	8.36364	58.1818		31.1953	9.62099	59.1837		25.3731	9.85075	64.7761
		35.5372	15.2893	49.1736		36.2989	12.4555	51.2456		31.7568	10.8108	57.4324		30.6748	9.20245	60.1227		24.2236	7.45342	68.323
		39.7059	11.2132	49.0809		36.6197	8.4507	54.9296		29.1391	11.9205	58.9404		26.9784	8.27338	64.7482		26.3492	4.7619	68.8889
	Mean	37.9923	12.8315	49.1762		35.9949	9.76273	54.2424		32.159	10.2737	57.5672		29.9679	9.16695	60.8651		24.7801	8.21493	67.0049
	Contingency table	944		913		496		587		489		664		491		759		425		862
