# Supplementary material for: Constraints on the G1/S transition pathway may favor selection of multicellularity as a passenger phenotype
Source: eLife. 2026 Jun 18;15:RP109833. doi: 10.7554/eLife.109833 (PMC13278735; doi:10.7554/eLife.109833)
Supplement: Figure 3—figure supplement 1—source data 1. [file elife-109833-fig3-figsupp1-data1.xlsx]

## Sheet: Fig 3 - Figure sup 1B
	ace2Δ/ace2Δ				quintuple mutant
	Snowflake #	Longest segment	Longest perpendicular segment		Snowflake #	Longest segment	Longest perpendicular segment
	1	42.5518	28.5816		1	42.7724	30.6922
	2	23.1831	15.2335		2	33.7845	27.4852
	3	17.4832	8.32525		3	32.7782	20.6613
	4	42.4582	34.8868		4	35.0315	23.334
	5	12.5667	11.2703		5	29.1312	23.574
	6	27.9144	18.5352		6	27.5882	15.246
	7	35.4017	33.5861		7	35.1487	20.081
	8	14.9534	7.33487		8	44.7035	29.6691
	9	32.1251	27.105		9	27.324	20.6694
	10	38.226	23.4327		10	18.9981	12.6525
	11	19.9078	8.67759		11	16.2913	7.39362
	12	66.3487	49.1767		12	43.6677	37.3968
	13	53.155	39.4843		13	34.5626	27.7515
	14	43.1209	42.5004		14	33.0613	29.5965
	15	50.9164	28.4829		15	29.8612	15.5069
	16	68.4981	34.3053		16	32.0634	19.2318
	17	23.7479	16.5693		17	20.2727	14.0657
	18	17.9528	14.4492		18	24.7253	16.6627
	19	26.6556	17.8603		19	25.0898	17.3096
	20	20.7305	8.05295		20	19.6186	17.1675
	21	27.8667	14.9662		21	47.085	37.4822
	22	38.5488	20.3055		22	40.3027	32.8025
	23	52.9991	39.9387		23	43.8602	22.2127
	24	26.619	22.2184		24	41.8376	29.9151
	25	65.9044	40.1594		25	49.5367	24.9025
	26	27.8021	13.505		26	27.1357	21.0676
	27	48.1741	43.9125		27	23.4642	22.4484
	28	14.7111	10.578		28	23.4471	16.0583
	29	44.8321	23.4155		29	13.7165	8.8776
	30	50.3332	24.2194		30	28.2919	13.3644
	31	44.9394	39.2576		31	20.708	7.02902
	32	21.9996	17.3901		32	32.5735	20.9127
	33	15.6005	9.36117		33	38.8914	19.4465
	34	53.3408	25.9607		34	39.4919	20.2991
	35	74.1179	39.7255		35	15.4553	15.3938
	36	23.5427	13.4547		36	63.0741	41.7247
	37	16.4443	8.39194		37	20.524	17.1526
	38	28.0527	15.4628		38	39.8744	19.6859
	39	12.4697	10.4935		39	30.5618	17.2595
	40	43.0265	30.1374		40	22.9678	14.5701
	41	31.8478	25.1102		41	41.185	28.9527
	42	43.012	34.6697		42	21.4377	13.2795
	43	15.5192	8.94483		43	39.4369	24.4627
	44	38.2224	25.3362		44	17.9977	17.3033
	45	54.6395	30.2477		45	23.936	17.3591
	46	46.019	32.3825		46	28.546	22.2782
	47	61.4825	50.2948		47	15.3526	9.35228
	48	29.5207	22.4152		48	36.7267	31.0595
	49	34.4903	25.9522		49	35.7533	18.7926
	50	51.5868	27.5571		50	51.5582	32.7032
	51	23.0434	13.9612		51	34.1322	26.7308
	52	41.0577	24.3853		52	18.3062	17.8025
	53	20.276	12.4015		53	29.5435	19.1761
	54	21.1694	11.9497		54	20.2633	17.1589
	55	32.7083	14.0715		55	36.5216	25.4159
	56	54.0995	27.2117		56	39.4056	25.7238
	57	81.9177	48.7406		57	20.8649	18.0861
	58	24.0716	21.0175		58	41.5566	41.2019
	59	44.5575	38.9475		59	57.253	36.381
	60	40.1472	24.0664		60	20.5057	15.6686
	61	42.0866	35.8251		61	17.7033	13.1915
	62	35.4111	21.5893		62	23.7644	16.772
	63	16.673	14.061		63	30.8437	11.8371
	64	43.2158	38.7437		64	21.9201	15.0261
	65	26.8348	22.5071		65	21.2282	9.87503
	66	39.3235	37.8188		66	45.9503	37.0472
	67	15.3125	13.9755		67	32.3852	22.194
	68	26.559	16.5201		68	33.5303	27.5745
	69	13.0075	12.7076		69	20.9322	11.7333
	70	18.5739	15.7428		70	37.419	22.9696
	71	20.2431	11.3849		71	41.6688	35.9857
	72	39.2656	21.6043		72	39.3078	32.1934
	73	46.3261	42.7066		73	21.0748	6.01339
	74	41.624	30.0215		74	20.8474	9.57385
	75	14.2111	7.42843		75	21.3291	16.1765
	76	41.0199	31.3446		76	52.5087	43.9358
	77	21.2079	12.6716		77	28.2748	21.7506
	78	19.4071	9.63968		78	29.0811	24.6277
	79	30.2786	19.2837		79	30.0171	14.1976
	80	24.476	24.127		80	20.253	15.7301
	81	62.0767	46.0954		81	24.6273	15.4848
	82	63.7683	34.1624		82	24.3591	13.9904
	83	43.3747	33.1209		83	21.0274	12.797
	84	21.7762	12.9161		84	16.1765	9.91288
	85	49.8176	25.2049		85	38.0932	33.4804
	86	13.2211	11.2998		86	21.3603	12.5925
	87	52.5524	44.5558		87	41.9075	29.6565
	88	23.4821	23.0392		88	35.6717	20.0884
	89	17.1744	11.6558		89	21.1576	7.095
	90	15.0106	8.80325		90	26.1612	23.3233
	91	42.7559	20.3542		91	35.904	19.9053
	92	49.5785	40.3844		92	13.3189	10.7945
	93	23.6742	15.7496		93	29.5651	21.1044
	94	26.1845	12.3685		94	30.521	25.9864
	95	53.3151	39.0279		95	35.6659	29.6523
	96	28.497	19.4888		96	23.3629	18.0526
	97	50.283	36.6481		97	33.6511	29.4431
	98	27.7206	20.8845		98	26.7251	19.9554
	99	10.4235	7.76683		99	41.3503	37.3686
	100	22.1659	16.5406		100	22.1193	21.1293
	101	55.6532	28.138		101	21.0175	14.7843
	102	29.0032	10.8029		102	23.2429	21.8105
	103	25.646	12.152		103	16.1059	10.4879
	104	15.8313	6.58911		104	16.0645	6.35251
	105	12.9528	9.8784		105	25.4025	17.6504
	106	17.3959	9.01155		106	30.3907	17.4117
	107	28.8329	14.2398		107	23.6716	19.1618
	108	15.5229	8.56661		108	16.0381	13.8036
	109	13.4241	7.02902		109	47.3941	24.7687
	110	18.7587	6.5992		110	34.7968	19.9367
	111	54.8384	40.7798		111	25.5071	16.6725
	112	31.3297	18.6475		112	38.666	35.4017
	113	44.0487	29.8369		113	20.7237	5.88331
	114	13.3076	6.95763		114	24.8163	24.5439
	115	14.1994	5.79783		115	29.5376	16.4656
	116	26.9391	20.8074		116	36.7061	24.0536
	117	24.8766	23.1577		117	17.3537	15.1694
	118	44.8509	26.3375		118	16.5784	9.58861
	119	15.0023	8.05295		119	42.3639	22.8097
	120	22.7757	11.9023		120	32.4201	21.0571
	121	19.5982	8.4325		121	39.1042	25.6713
	122	15.7449	9.57733		122	24.4206	19.965
	123	20.5418	14.6697		123	19.6084	12.7814
	124	19.985	9.71277		124	35.1251	22.7219
	125	40.7362	26.1832		125	24.0992	12.238
	126	18.1785	11.1389		126	60.1469	33.4677
	127	46.8492	45.2315		127	35.3989	22.8042
	128	28.4742	17.1876		128	18.1643	17.5516
	129	20.5126	15.8675		129	30.3216	25.1335
	130	23.0892	14.5604		130	46.6149	37.8261
	131	57.9434	56.2228		131	29.8314	21.5889
	132	25.8158	22.779		132	28.1782	25.3448
	133	32.5172	10.4522		133	32.0235	26.4047
	134	59.483	48.153		134	20.9509	11.773
	135	21.3533	13.7903		135	17.8692	15.12
	136	16.9123	9.91959		136	14.6884	11.4353
	137	21.2913	11.2593		137	44.8532	27.0869
	138	16.2027	8.95598		138	14.1554	11.3168
	139	39.0425	7.37108		139	15.4934	5.29372
	140	37.2924	25.8032		140	28.6843	26.0523
	141	58.1884	47.6567		141	23.4801	18.6974
	142	26.7556	13.8247		142	19.2032	7.44409
	143	29.8127	20.1447		143	18.7494	14.8013
	144	22.0012	19.6288		144	10.1714	5.5485
	145	29.0582	9.49443		145	30.2886	28.3759
	146	21.6816	21.6816		146	29.6161	13.3026
	147	20.8006	18.0605		147	29.7906	24.288
	148	34.2533	24.8679		148	26.7183	19.2249
	149	40.2025	28.5699		149	20.8262	17.4284
	150	50.347	25.0951		150	20.1641	9.79466
	151	33.9331	16.1958		151	13.6326	5.76906
	152	44.8328	34.0504		152	24.8616	24.5012
	153	17.6051	12.7736		153	34.642	20.6436
	154	56.0083	55.3386		154	21.4807	17.4468
	155	18.4988	12.2448		155	25.2484	17.8934
	156	32.7124	31.115		156	55.8629	31.2691
	157	13.2123	10.6696		157	40.1475	24.5131
	158	28.8444	18.6158		158	38.9272	23.1443
	159	12.8094	6.92887		159	23.3119	20.5224
	160	10.9285	6.34203		160	32.8406	22.6734
	161	50.987	35.9441		161	26.8819	20.817
	162	28.3462	21.9323		162	35.6376	13.9803
	163	22.039	16.8583		163	49.0448	23.7153
	164	26.7453	17.2918		164	32.3922	22.6996
	165	17.7073	10.3618		165	15.17	13.3752
	166	22.0269	5.74738		166	28.3377	13.3626
	167	35.3378	24.5195		167	19.8111	16.4195
	168	53.4927	30.4817		168	32.6112	30.561
	169	21.5121	11.5957		169	17.8268	6.57773
	170	38.5934	31.3977		170	20.8617	10.5764
	171	49.5807	45.4025		171	47.2353	25.3313
	172	30.4847	7.73247		172	19.6766	12.8178
	173	31.8805	28.2298		173	26.5627	19.7315
	174	23.771	15.1722		174	24.1588	14.3857
	175	21.3069	14.6186		175	15.12	13.1637
	176	18.5697	7.8975		176	19.675	11.8827
	177	23.0564	16.5165		177	26.9576	11.4112
	178	16.5462	9.92546		178	16.8354	6.32495
	179	58.3253	33.8425		179	42.3845	24.9811
	180	25.2369	21.5908		180	28.3988	12.5236
	181	17.2769	12.7762		181	19.7576	12.9778
	182	18.3343	12.6617		182	19.7134	17.2658
	183	62.0789	44.9877		183	21.4951	17.7463
	184	14.4261	5.58139		184	16.7442	9.10433
	185	20.9044	18.2016		185	14.5861	8.77579
	186	23.078	14.8036		186	30.4956	17.5212
	187	40.4329	15.6447		187	31.8881	19.9476
	188	38.7346	24.8341		188	23.9485	19.221
	189	40.1196	29.2492		189	28.2372	27.7281
					189	38.4247	31.2702
					189	21.5384	11.9525
					189	30.6426	20.2848
					189	38.0655	27.7318
					189	24.7952	16.514
					189	22.2614	14.7994
					189	34.6373	23.4818
					189	18.9889	8.34122
					189	32.749	27.8985
					189	26.0259	18.6158
					189	24.3376	14.817
					189	19.9879	9.01617
					189	46.3403	31.4389
					189	23.8088	20.3039
					189	22.764	20.2115
					189	28.3369	10.3281
					189	15.0494	6.13259
					189	39.6893	27.8296
					189	27.1933	18.3742
					189	27.1026	27.0894
					189	17.6432	17.2211
					189	19.8677	10.0355
					189	44.7697	15.4073
					189	24.0812	19.6462
					189	20.3088	7.12309

## Sheet: Fig 3 - Figure sup 1C
		replicates	1-2 cells	3 cellules	4+ cellules	total
	ace2Δ/ace2Δ	1	4	5	192	201
			0.0199005	0.0248756	0.955224
		2	3	8	213	224
			0.0133929	0.0357143	0.950893
		3	5	9	198	212
			0.0235849	0.0424528	0.933962
	quintuple mutant	1	3	7	203	213
			0.0140845	0.0328638	0.953052
		2	4	6	209	219
			0.0182648	0.0273973	0.954338
		3	3	8	199	210
			0.0142857	0.0380952	0.947619
