# Supplementary material for: Constraints on the G1/S transition pathway may favor selection of multicellularity as a passenger phenotype
Source: eLife. 2026 Jun 18;15:RP109833. doi: 10.7554/eLife.109833 (PMC13278735; doi:10.7554/eLife.109833)
Supplement: Figure 3—source data 1. [file elife-109833-fig3-data1.xlsx]

## Sheet: Fig 3A
		cln3Δ/cln3Δ strain						cln3Δ/cln3Δ strain
		replicate #1	replicate #2	replicate #3	total	Cummulative cells forming a bud		Budding index	SD	n	Contigency table
number of initial cells		104	113	121	338						bud	unbud
# of initial cells forming a first bud at t=	60	0	0	0	0	0		0	0	338	0	338
	75	0	0	0	0	0		0	0	338	0	338
	90	0	0	0	0	0		0	0	338	0	338
	105	0	0	0	0	0		0	0	338	0	338
	120	0	0	0	0	0		0	0	338	0	338
	135	0	0	0	0	0		0	0	338	0	338
	150	0	2	3	5	5		0.0147929	0.00271964	338	5	333
	165	2	2	4	8	13		0.0384615	0.00707107	338	13	325
	180	3	9	3	15	28		0.0828402	0.01523	338	28	310
	195	6	5	11	22	50		0.147929	0.0271964	338	50	288
	210	6	6	10	22	72		0.213018	0.0391628	338	72	266
	225	7	10	6	23	95		0.281065	0.0516732	338	95	243
	240	4	6	3	13	108		0.319527	0.0587443	338	108	230
		quintuple mutant cln3Δ/cln3Δ						quintuple mutant cln3Δ/cln3Δ
		replicate #1	replicate #2	replicate #3	total	Cummulative cells forming a bud		Budding index	SD	n	Contigency table
number of initial cells		114	102	105	321						bud	unbud
# of cell forming a first bud at t=	60	0	0	0	0	0		0	0	321	0	321
	75	0	0	0	0	0		0	0	321	0	321
	90	0	0	0	0	0		0	0	321	0	321
	105	0	0	0	0	0		0	0	321	0	321
	120	0	0	0	0	0		0	0	321	0	321
	135	0	1	0	1	1		0.00311526	0.000558146	321	1	320
	150	0	2	2	4	5		0.0155763	0.00279073	321	5	316
	165	1	0	0	1	6		0.0186916	0.00334887	321	6	315
	180	1	2	7	10	16		0.0498442	0.00893033	321	16	305
	195	2	6	8	16	32		0.0996885	0.0178607	321	32	289
	210	4	5	4	13	45		0.140187	0.0251166	321	45	276
	225	9	9	4	22	67		0.208723	0.0373958	321	67	254
	240	11	8	10	29	96		0.299065	0.053582	321	96	225

## Sheet: Fig 3B
		ace2Δ/ace2Δ cln3Δ/cln3Δ strain						ace2Δ/ace2Δ cln3Δ/cln3Δ strain
		replicate #1	replicate #2	replicate #3	total	Cummulative cells forming a bud		Budding index	SD	n	Contigency table
number of initial cells		95	122	83	300						bud	unbud
# of initial cells forming a first bud at t=	60	0	0	0	0	0		0	0	300	0	300
	75	0	0	0	0	0		0	0	300	0	300
	90	0	0	0	0	0		0	0	300	0	300
	105	0	0	0	0	0		0	0	300	0	300
	120	1	0	0	1	1		0.00333333	0.00057735	300	1	299
	135	0	0	1	1	2		0.00666667	0.0011547	300	2	298
	150	1	1	2	4	6		0.02	0.0034641	300	6	294
	165	2	5	2	9	15		0.05	0.00866025	300	15	285
	180	4	5	6	15	30		0.1	0.0173205	300	30	270
	195	6	9	7	22	52		0.173333	0.0300222	300	52	248
	210	8	11	10	29	81		0.27	0.0467654	300	81	219
	225	10	12	5	27	108		0.36	0.0623538	300	108	192
	240	10	9	5	24	132		0.44	0.0762102	300	132	168
		quintuple mutant cln3Δ/cln3Δ						quintuple mutant cln3Δ/cln3Δ
		replicate #1	replicate #2	replicate #3	total	Cummulative cells forming a bud		Budding index	SD	n	Contigency table
number of initial cells		103	124	75	302						bud	unbud
# of cell forming a first bud at t=	60	0	0	0	0	0		0	0	302	0	302
	75	0	0	0	0	0		0	0	302	0	302
	90	0	0	0	0	0		0	0	302	0	302
	105	0	0	0	0	0		0	0	302	0	302
	120	0	0	0	0	0		0	0	302	0	302
	135	0	0	0	0	0		0	0	302	0	302
	150	0	0	0	0	0		0	0	302	0	302
	165	1	0	0	1	1		0.00331126	0.000575435	302	1	301
	180	0	1	1	2	3		0.00993377	0.00172631	302	3	299
	195	0	0	5	5	8		0.0264901	0.00460348	302	8	294
	210	1	2	5	8	16		0.0529801	0.00920697	302	16	286
	225	2	13	4	19	35		0.115894	0.0201402	302	35	267
	240	5	6	7	18	53		0.175497	0.0304981	302	53	249

## Sheet: Fig 3C
	CLN3 background	Point 0				Point 2				Point 4				Point 6				Point 8				Point 10
		1-2 cells	3 cells	4+ cells	tot	1-2 cells	3 cells	4+ cells	tot	1-2 cells	3 cells	4+ cells	tot	1-2 cells	3 cells	4+ cells	tot	1-2 cells	3 cells	4+ cells	tot	1-2 cells	3 cells	4+ cells	tot
	Competiton #1	120	17	136	273	113	16	128	257	111	10	129	250	133	4	122	259				0				0
		0.43956	0.0622711	0.498168		0.439689	0.0622568	0.498054		0.444	0.04	0.516		0.513514	0.015444	0.471042		#DIV/0!	#DIV/0!	#DIV/0!		#DIV/0!	#DIV/0!	#DIV/0!
	Competiton #2	118	22	151	291	119	13	123	255	120	12	128	260	130	2	123	255				0				0
		0.405498	0.0756014	0.5189		0.466667	0.0509804	0.482353		0.461538	0.0461538	0.492308		0.509804	0.00784314	0.482353		#DIV/0!	#DIV/0!	#DIV/0!		#DIV/0!	#DIV/0!	#DIV/0!
	Competiton #3	146	28	166	340	111	11	129	251	130	9	130	269	131	3	118	252				0				0
		0.429412	0.0823529	0.488235		0.442231	0.0438247	0.513944		0.483271	0.0334572	0.483271		0.519841	0.0119048	0.468254		#DIV/0!	#DIV/0!	#DIV/0!		#DIV/0!	#DIV/0!	#DIV/0!
	% of each type of entity	43.956	6.22711	49.8168		43.9689	6.22568	49.8054		44.4	4	51.6		51.3514	1.5444	47.1042		#DIV/0!	#DIV/0!	#DIV/0!		#DIV/0!	#DIV/0!	#DIV/0!
		40.5498	7.56014	51.89		46.6667	5.09804	48.2353		46.1538	4.61538	49.2308		50.9804	0.784314	48.2353		#DIV/0!	#DIV/0!	#DIV/0!		#DIV/0!	#DIV/0!	#DIV/0!
		42.9412	8.23529	48.8235		44.2231	4.38247	51.3944		48.3271	3.34572	48.3271		51.9841	1.19048	46.8254		#DIV/0!	#DIV/0!	#DIV/0!		#DIV/0!	#DIV/0!	#DIV/0!
	Mean	42.4823	7.34085	50.1768		44.9529	5.2354	49.8117		46.2937	3.98704	49.7193		51.4386	1.17306	47.3883		#DIV/0!	#DIV/0!	#DIV/0!		#DIV/0!	#DIV/0!	#DIV/0!
	Contingency table	451		453		383		380		392		387		403		363		0		0		0		0
	cln3∆ background	Point 0				Point 2				Point 4				Point 6				Point 8				Point 10
		1-2 cells	3 cells	4+ cells	tot	1-2 cells	3 cells	4+ cells	tot	1-2 cells	3 cells	4+ cells	tot	1-2 cells	3 cells	4+ cells	tot	1-2 cells	3 cells	4+ cells	tot	1-2 cells	3 cells	4+ cells	tot
	Competiton #1	164	29	185	378	117	15	125	257	127	13	135	275	124	17	129	270				0				0
		0.433862	0.0767196	0.489418		0.455253	0.0583658	0.486381		0.461818	0.0472727	0.490909		0.459259	0.062963	0.477778		#DIV/0!	#DIV/0!	#DIV/0!		#DIV/0!	#DIV/0!	#DIV/0!
	Competiton #2	150	25	172	347	117	20	137	274	116	13	126	255	115	17	118	250				0				0
		0.432277	0.0720461	0.495677		0.427007	0.0729927	0.5		0.454902	0.0509804	0.494118		0.46	0.068	0.472		#DIV/0!	#DIV/0!	#DIV/0!		#DIV/0!	#DIV/0!	#DIV/0!
	Competiton #3	96	23	126	245	110	16	131	257	113	20	132	265	137	9	135	281				0				0
		0.391837	0.0938776	0.514286		0.428016	0.0622568	0.509728		0.426415	0.0754717	0.498113		0.487544	0.0320285	0.480427		#DIV/0!	#DIV/0!	#DIV/0!		#DIV/0!	#DIV/0!	#DIV/0!
	% of each type of entity	43.3862	7.67196	48.9418		45.5253	5.83658	48.6381		46.1818	4.72727	49.0909		45.9259	6.2963	47.7778		#DIV/0!	#DIV/0!	#DIV/0!		#DIV/0!	#DIV/0!	#DIV/0!
		43.2277	7.20461	49.5677		42.7007	7.29927	50		45.4902	5.09804	49.4118		46	6.8	47.2		#DIV/0!	#DIV/0!	#DIV/0!		#DIV/0!	#DIV/0!	#DIV/0!
		39.1837	9.38776	51.4286		42.8016	6.22568	50.9728		42.6415	7.54717	49.8113		48.7544	3.20285	48.0427		#DIV/0!	#DIV/0!	#DIV/0!		#DIV/0!	#DIV/0!	#DIV/0!
	Mean	41.9325	8.08811	49.9794		43.6759	6.45384	49.8703		44.7712	5.79083	49.438		46.8935	5.43305	47.6735		#DIV/0!	#DIV/0!	#DIV/0!		#DIV/0!	#DIV/0!	#DIV/0!
	Contingency table	487		483		395		393		402		393		419		382		0		0		0		0
