# Supplementary material for: Constraints on the G1/S transition pathway may favor selection of multicellularity as a passenger phenotype
Source: eLife. 2026 Jun 18;15:RP109833. doi: 10.7554/eLife.109833 (PMC13278735; doi:10.7554/eLife.109833)
Supplement: Figure 4—figure supplement 1—source data 1. [file elife-109833-fig4-figsupp1-data1.xlsx]

## Sheet: Fig 4 - Figure sup 1A
		replicates	single cell entities	multi cells entities	total
	ace2 before sonication	1	43	211	254
			0.169291	0.830709
		2	43	218	261
			0.164751	0.835249
		3	43	230	273
			0.157509	0.842491
	ace2 after sonication	1	108	104	212
			0.509434	0.490566
		2	114	99	213
			0.535211	0.464789
		3	131	100	231
			0.5671	0.4329

## Sheet: Fig 4 - Figure sup 1B
			blue methylen staining
		replicates	unstained cells	stained cells	total
	ace2 before sonication	1	202	12	214
			0.943925	0.0560748
		2	200	7	207
			0.966184	0.0338164
		3	210	10	220
			0.954545	0.0454545
	ace2 after sonication	1	208	13	221
			0.941176	0.0588235
		2	210	10	220
			0.954545	0.0454545
		3	205	11	216
			0.949074	0.0509259

## Sheet: Fig 4 - Figure sup 1C
		ACE2 cln3Δ - sonicated						ACE2 cln3Δ - sonicated
		replicate #1	replicate #2	replicate #3	total	Cummulative cells forming a bud		Budding index	SD	n	Contigency table
number of initial cells		76	98	68	242						bud	unbud
# of initial cells forming a first bud at t=	60	0	0	0	0	0		0	0	242	0	242
	75	0	0	0	0	0		0	0	242	0	242
	90	0	0	1	1	1		0.00413223	0.000642824	242	1	241
	105	0	0	0	0	1		0.00413223	0.000642824	242	1	241
	120	0	0	8	8	9		0.0371901	0.00578542	242	9	233
	135	0	0	3	3	12		0.0495868	0.00771389	242	12	230
	150	1	4	0	5	17		0.0702479	0.010928	242	17	225
	165	5	6	2	13	30		0.123967	0.0192847	242	30	212
	180	2	7	2	11	41		0.169421	0.0263558	242	41	201
	195	1	8	3	12	53		0.219008	0.0340697	242	53	189
	210	2	9	1	12	65		0.268595	0.0417836	242	65	177
	225	3	9	0	12	77		0.318182	0.0494975	242	77	165
	240	7	7	2	16	93		0.384298	0.0597827	242	93	149
		ace2Δ cln3Δ -sonicated						ace2Δ cln3Δ - sonicated
		replicate #1	replicate #2	replicate #3	total	Cummulative cells forming a bud		Budding index	SD	n	Contigency table
number of initial cells		91	97	63	251						bud	unbud
# of cell forming a first bud at t=	60	0	0	0	0	0		0	0	251	0	251
	75	0	0	0	0	0		0	0	251	0	251
	90	0	0	5	5	5		0.0199203	0.00315597	251	5	246
	105	0	1	5	6	11		0.0438247	0.00694314	251	11	240
	120	1	5	6	12	23		0.0916335	0.0145175	251	23	228
	135	0	7	12	19	42		0.167331	0.0265102	251	42	209
	150	6	11	6	23	65		0.258964	0.0410276	251	65	186
	165	1	7	3	11	76		0.302789	0.0479708	251	76	175
	180	7	8	4	19	95		0.378486	0.0599635	251	95	156
	195	10	5	1	16	111		0.442231	0.0700626	251	111	140
	210	8	9	1	18	129		0.513944	0.0814241	251	129	122
	225	6	2	2	10	139		0.553785	0.087736	251	139	112
	240	7	3	3	13	152		0.605578	0.0959415	251	152	99
		ACE2 cln3Δ						ACE2 cln3Δ
		replicate #1	replicate #2	replicate #3	total	Cummulative cells forming a bud		Budding index	SD	n	Contigency table
number of initial cells		122	109	57	288						bud	unbud
# of initial cells forming a first bud at t=	60	0	0	0	0	0		0	0	288	0	288
	75	0	0	0	0	0		0	0	288	0	288
	90	0	0	0	0	0		0	0	288	0	288
	105	0	0	0	0	0		0	0	288	0	288
	120	0	2	2	4	4		0.0138889	0.00235702	288	4	284
	135	0	0	1	1	5		0.0173611	0.00294628	288	5	283
	150	1	2	1	4	9		0.03125	0.0053033	288	9	279
	165	2	5	1	8	17		0.0590278	0.0100173	288	17	271
	180	5	7	3	15	32		0.111111	0.0188562	288	32	256
	195	2	10	2	14	46		0.159722	0.0271058	288	46	242
	210	8	17	2	27	73		0.253472	0.0430157	288	73	215
	225	6	5	3	14	87		0.302083	0.0512652	288	87	201
	240	13	14	7	34	121		0.420139	0.0712999	288	121	167
		ace2 cln3Δ						ace2 cln3Δ
		replicate #1	replicate #2	replicate #3	total	Cummulative cells forming a bud		Budding index	SD	n	Contigency table
number of initial cells		134	102	57	293						bud	unbud
# of cell forming a first bud at t=	60	0	0	0	0	0		0	0	293	0	293
	75	0	3	0	3	3		0.0102389	0.00175262	293	3	290
	90	0	4	3	7	10		0.0341297	0.00584206	293	10	283
	105	1	12	1	14	24		0.0819113	0.0140209	293	24	269
	120	0	12	4	16	40		0.136519	0.0233682	293	40	253
	135	3	6	2	11	51		0.174061	0.0297945	293	51	242
	150	1	7	4	12	63		0.215017	0.036805	293	63	230
	165	3	10	4	17	80		0.273038	0.0467365	293	80	213
	180	9	6	5	20	100		0.341297	0.0584206	293	100	193
	195	9	8	4	21	121		0.412969	0.070689	293	121	172
	210	8	5	10	23	144		0.491468	0.0841257	293	144	149
	225	15	3	2	20	164		0.559727	0.0958098	293	164	129
	240	23	5	0	28	192		0.65529	0.112168	293	192	101
