# Supplementary material for: Constraints on the G1/S transition pathway may favor selection of multicellularity as a passenger phenotype
Source: eLife. 2026 Jun 18;15:RP109833. doi: 10.7554/eLife.109833 (PMC13278735; doi:10.7554/eLife.109833)
Supplement: Figure 4—source data 1. [file elife-109833-fig4-data1.xlsx]

## Sheet: Fig 4A
ace2/ace2 cln3/cln3 entities composed of 1 to 3 cells	number of initial cells		187		Cummulative cells forming a bud		Budding index	SD	n	Contigency table
										bud	unbud
	# of initial cells forming a first bud at t=	60	0		0		0	0	187	0	187
		75	0		0		0	0	187	0	187
		90	1		1		0.00534759	0.000731272	187	1	186
		105	0		1		0.00534759	0.000731272	187	1	186
		120	1		2		0.0106952	0.00146254	187	2	185
		135	4		6		0.0320856	0.00438763	187	6	181
		150	10		16		0.0855615	0.0117004	187	16	171
		165	19		35		0.187166	0.0255945	187	35	152
		180	17		52		0.278075	0.0380262	187	52	135
		195	22		74		0.395722	0.0541142	187	74	113
		210	11		85		0.454545	0.0621582	187	85	102
		225	11		96		0.513369	0.0702022	187	96	91
		240	23		119		0.636364	0.0870214	187	119	68
ace2/ace2 cln3/cln3 entities composed of 4 to 10 cells	number of initial cells		184		Cummulative cells forming a bud		Budding index	SD	n	Contigency table
										bud	unbud
	# of cell forming a first bud at t=	60	0		0		0	0	184	0	184
		75	0		0		0	0	184	0	184
		90	0		0		0	0	184	0	184
		105	0		0		0	0	184	0	184
		120	3		3		0.0163043	0.00221163	184	3	181
		135	9		12		0.0652174	0.00884652	184	12	172
		150	8		20		0.108696	0.0147442	184	20	164
		165	6		26		0.141304	0.0191675	184	26	158
		180	13		39		0.211957	0.0287512	184	39	145
		195	25		64		0.347826	0.0471814	184	64	120
		210	23		87		0.472826	0.0641373	184	87	97
		225	21		108		0.586957	0.0796187	184	108	76
		240	15		123		0.668478	0.0906768	184	123	61
ace2/ace2 cln3/cln3 entities composed of 11+ cells	number of initial cells		205		Cummulative cells forming a bud		Budding index	SD	n	Contigency table
										bud	unbud
	# of cell forming a first bud at t=	60	0		0		0	0	205	0	205
		75	0		0		0	0	205	0	205
		90	0		0		0	0	205	0	205
		105	0		0		0	0	205	0	205
		120	0		0		0	0	205	0	205
		135	1		1		0.00487805	0.00069843	205	1	204
		150	9		10		0.0487805	0.0069843	205	10	195
		165	16		26		0.126829	0.0181592	205	26	179
		180	15		41		0.2	0.0286356	205	41	164
		195	19		60		0.292683	0.0419058	205	60	145
		210	21		81		0.395122	0.0565729	205	81	124
		225	19		100		0.487805	0.069843	205	100	105
		240	22		122		0.595122	0.0852085	205	122	83

## Sheet: Fig 4B
		ACE2 cln3Δ - 1 to 3 cell entities						ACE2 cln3Δ - 1 to 3 cell entities
		replicate #1	replicate #2	replicate #3	total	Cummulative cells forming a bud		Budding index	SD	n	Contigency table
number of initial cells		76	98	68	242						bud	unbud
# of initial cells forming a first bud at t=	60	0	0	0	0	0		0	0	242	0	242
	75	0	0	0	0	0		0	0	242	0	242
	90	0	0	1	1	1		0.00413223	0.000642824	242	1	241
	105	0	0	0	0	1		0.00413223	0.000642824	242	1	241
	120	0	0	8	8	9		0.0371901	0.00578542	242	9	233
	135	0	0	3	3	12		0.0495868	0.00771389	242	12	230
	150	1	4	0	5	17		0.0702479	0.010928	242	17	225
	165	5	6	2	13	30		0.123967	0.0192847	242	30	212
	180	2	7	2	11	41		0.169421	0.0263558	242	41	201
	195	1	8	3	12	53		0.219008	0.0340697	242	53	189
	210	2	9	1	12	65		0.268595	0.0417836	242	65	177
	225	3	9	0	12	77		0.318182	0.0494975	242	77	165
	240	7	7	2	16	93		0.384298	0.0597827	242	93	149
		ace2Δ cln3Δ - 1 to 3 cell entities						ace2Δ cln3Δ - 1 to 3 cell entities
		replicate #1	replicate #2	replicate #3	total	Cummulative cells forming a bud		Budding index	SD	n	Contigency table
number of initial cells		91	97	63	251						bud	unbud
# of cell forming a first bud at t=	60	0	0	0	0	0		0	0	251	0	251
	75	0	0	0	0	0		0	0	251	0	251
	90	0	0	5	5	5		0.0199203	0.00315597	251	5	246
	105	0	1	5	6	11		0.0438247	0.00694314	251	11	240
	120	1	5	6	12	23		0.0916335	0.0145175	251	23	228
	135	0	7	12	19	42		0.167331	0.0265102	251	42	209
	150	6	11	6	23	65		0.258964	0.0410276	251	65	186
	165	1	7	3	11	76		0.302789	0.0479708	251	76	175
	180	7	8	4	19	95		0.378486	0.0599635	251	95	156
	195	10	5	1	16	111		0.442231	0.0700626	251	111	140
	210	8	9	1	18	129		0.513944	0.0814241	251	129	122
	225	6	2	2	10	139		0.553785	0.087736	251	139	112
	240	7	3	3	13	152		0.605578	0.0959415	251	152	99
