# Supplementary material for: Constraints on the G1/S transition pathway may favor selection of multicellularity as a passenger phenotype
Source: eLife. 2026 Jun 18;15:RP109833. doi: 10.7554/eLife.109833 (PMC13278735; doi:10.7554/eLife.109833)
Supplement: Figure 5—source data 1. [file elife-109833-fig5-data1.xlsx]

## Sheet: Fig 5A
		ACE2 kss1Δ cln3Δ						ACE2 kss1Δ cln3Δ
		replicate #1	replicate #2	replicate #3	total	Cummulative cells forming a bud		Budding index	SD	n	Contigency table
number of initial cells		96	96	86	278						bud	unbud
# of initial cells forming a first bud at t=	60	0	0	0	0	0		0	0	278	0	278
	75	0	0	0	0	0		0	0	278	0	278
	90	0	0	0	0	0		0	0	278	0	278
	105	0	0	1	1	1		0.00359712	0.00059976	278	1	277
	120	0	0	3	3	4		0.0143885	0.00239904	278	4	274
	135	0	1	6	7	11		0.0395683	0.00659736	278	11	267
	150	0	4	1	5	16		0.057554	0.00959616	278	16	262
	165	2	4	4	10	26		0.0935252	0.0155938	278	26	252
	180	2	6	11	19	45		0.161871	0.0269892	278	45	233
	195	2	11	9	22	67		0.241007	0.0401839	278	67	211
	210	5	7	6	18	85		0.305755	0.0509796	278	85	193
	225	7	6	7	20	105		0.377698	0.0629748	278	105	173
	240	6	11	3	20	125		0.44964	0.07497	278	125	153
		ace2Δ kss1Δ cln3Δ						ace2Δ kss1Δ cln3Δ
		replicate #1	replicate #2	replicate #3	total	Cummulative cells forming a bud		Budding index	SD	n	Contigency table
number of initial cells		113	106	87	306						bud	unbud
# of cell forming a first bud at t=	60	0	0	0	0	0		0	0	306	0	306
	75	0	0	0	0	0		0	0	306	0	306
	90	0	0	0	0	0		0	0	306	0	306
	105	0	0	0	0	0		0	0	306	0	306
	120	0	1	1	2	2		0.00653595	0.00114332	306	2	304
	135	0	3	2	5	7		0.0228758	0.00400163	306	7	299
	150	3	9	10	22	29		0.0947712	0.0165782	306	29	277
	165	1	4	7	12	41		0.133987	0.0234381	306	41	265
	180	4	5	2	11	52		0.169935	0.0297264	306	52	254
	195	3	7	3	13	65		0.212418	0.037158	306	65	241
	210	5	9	2	16	81		0.264706	0.0463046	306	81	225
	225	4	10	10	24	105		0.343137	0.0600245	306	105	201
	240	7	4	9	20	125		0.408497	0.0714577	306	125	181

## Sheet: Fig 5B
			Genomic DNA range amplified by CLN1 primers
		well	A1	A2	A3	A4	A5
		DNA quantity	2	0.4	0.2	0.04	0.02
		log (DNA quantity)	0.30103	-0.39794	-0.69897	-1.39794	-1.69897
		Cq	27.7	29.28	30.85	32.74	34.42
			Genomic DNA range amplified by ACT1 primers
		well	E1	E2	E3	E4	E5
		DNA quantity	2	0.4	0.2	0.04	0.02
		log (DNA quantity)	0.30103	-0.39794	-0.69897	-1.39794	-1.69897
		Cq	22.1	24.49	25.4	27.82	28.99
	Sample : 15 minutes afer dilution into fresh medium of a stationary phase culture	replicates	Cq				DNA quantity		quantity of CLN1 DNA / quantity of ACT1 DNA	nomalization at 1 for the ACE2 strain
			CLN1 primers		ACT1 primers		CLN1 primers	ACT1 primers
			well	Cq	well	Cq				mean	normalisation
	ace2Δ cln3Δ	Y12565	B1	31.45	F1	26.8	0.400119	0.338653	1.1815		1.7831
		Y12566	B2	31.83	F2	26.79	0.356831	0.339644	1.0506		1.58554
		Y12958	B3	31.39	F3	26.91	0.407418	0.327933	1.24238		1.87497
	ACE2 cln3Δ	Y12568	C1	33.81	G1	27.47	0.1965	0.278401	0.705815	0.662613	1.0652
		Y12567	C2	33.98	G2	27.51	0.186688	0.275164	0.678461		1.02392
		Y12959	C3	34.31	G3	27.45	0.169018	0.280034	0.603562		0.910882

## Sheet: Fig 5C
			Genomic DNA range amplified by CLN1 primers
		well	A1	A2	A3	A4	A5
		DNA quantity	2	0.4	0.2	0.04	0.02
		log (DNA quantity)	0.30103	-0.39794	-0.69897	-1.39794	-1.69897
		Cq	27.23	29.72	31.24	33.5	35.26
			Genomic DNA range amplified by ACT1 primers
		well	E1	E2	E3	E4	E5
		DNA quantity	2	0.4	0.2	0.04	0.02
		log (DNA quantity)	0.30103	-0.39794	-0.69897	-1.39794	-1.69897
		Cq	21.94	24.73	26.14	28.9	30.14
	Sample : 15 minutes afer dilution into fresh medium of a stationary phase culture	replicates	Cq				DNA quantity		quantity of CLN1 DNA / quantity of ACT1 DNA	nomalization at 1 for the ACE2 strain
			CLN1 primers		ACT1 primers		CLN1 primers	ACT1 primers
			well	Cq	well	Cq				mean	normalisation
	ace2Δ kss1Δ cln3Δ	#1	B1	37.5	F1	30.24	0.0969292	0.178922	0.541739		0.805414
		#2	B2	37.11	F2	30.46	0.107046	0.16959	0.631206		0.938426
		#3	B3	36.46	F3	30.19	0.126308	0.181114	0.697393		1.03683
	ACE2 kss1Δ cln3Δ	#1	C1	37.1	G1	29.4	0.107319	0.21953	0.488857	0.672622	0.726792
		#2	C2	35.26	G2	29.88	0.171432	0.195314	0.877724		1.30493
		#3	C3	36.48	G3	29.93	0.125666	0.192951	0.651286		0.968279
