# Supplementary material for: Constraints on the G1/S transition pathway may favor selection of multicellularity as a passenger phenotype
Source: eLife. 2026 Jun 18;15:RP109833. doi: 10.7554/eLife.109833 (PMC13278735; doi:10.7554/eLife.109833)
Supplement: Figure 6—figure supplement 1—source data 1. [file elife-109833-fig6-figsupp1-data1.xlsx]

## Sheet: Fig 6 - Figure sup 1B
		replicates	1-2 cells	3 cellules	4+ cellules	total
	ace2	1	16	29	174	219
			0.0730594	0.13242	0.794521
		2	17	35	172	224
			0.0758929	0.15625	0.767857
		3	23	25	189	237
			0.0970464	0.105485	0.797468
	AMN1368D	1	25	26	169	220
			0.113636	0.118182	0.768182
		2	19	24	185	228
			0.0833333	0.105263	0.811404
		3	21	25	180	226
			0.0929204	0.110619	0.79646

## Sheet: Fig 6 - Figure sup 1C
	ace2Δ				AMN1368D
	Snowflake #	Longest segment	Longest perpendicular segment		Snowflake #	Longest segment	Longest perpendicular segment
	1	16.3835	10.0752		1	15.6728	14.2542
	2	11.1344	9.76166		2	9.55994	9.49901
	3	9.18712	9.04197		3	16.5125	11.1843
	4	14.2181	10.8621		4	15.7131	13.679
	5	18.5051	12.3443		5	14.1906	12.9654
	6	9.43906	6.192		6	13.963	9.85066
	7	12.2087	10.4599		7	18.0351	14.6129
	8	10.563	7.8563		8	11.816	11.3549
	9	10.1918	9.80739		9	21.577	12.0445
	10	7.98472	4.60848		10	10.4689	8.4246
	11	22.7385	17.4727		11	15.0293	12.9845
	12	16.5558	12.6657		12	13.9039	8.09725
	13	13.3843	9.66898		13	6.16102	4.53706
	14	8.15868	5.289		14	9.22508	7.71092
	15	11.2534	9.46195		15	12.7055	6.76973
	16	14.8686	8.87104		16	14.8843	11.2315
	17	7.71955	7.32125		17	16.7624	11.4868
	18	9.69905	8.95598		18	13.7602	12.2652
	19	13.0443	10.7416		19	15.7062	14.7909
	20	11.6847	9.94639		20	11.115	8.94669
	21	10.3498	7.42507		21	9.34605	6.78937
	22	10.4689	6.48217		22	22.2483	19.999
	23	12.7501	9.46283		23	9.23229	7.65025
	24	16.4157	13.6975		24	26.9613	16.512
	25	12.491	10.0328		25	11.4462	10.8922
	26	16.8806	12.3712		26	18.5123	11.097
	27	8.75729	4.79951		27	23.2805	15.1596
	28	16.5201	13.468		28	17.5691	13.2814
	29	14.4997	12.5528		29	19.0265	15.6431
	30	13.1003	10.3273		30	12.6479	10.5644
	31	10.3498	9.85817		31	13.297	7.84676
	32	15.093	7.3076		32	13.7105	9.46986
	33	9.03461	6.75866		33	13.5395	7.45638
	34	9.09702	6.94686		34	16.1765	14.849
	35	9.74441	9.26288		35	18.1207	15.3741
	36	15.6135	10.7332		36	15.6728	11.7737
	37	14.197	10.3417		37	15.7465	10.9126
	38	11.5417	10.5882		38	15.3098	11.4909
	39	7.89328	7.01005		39	6.07534	4.13605
	40	11.6422	9.36117		40	25.0529	18.8966
	41	12.3045	7.79356		41	28.518	16.2688
	42	11.9977	6.11765		42	15.6728	12.4169
	43	8.33623	7.64155		43	14.486	12.4837
	44	12.5767	11.2788		44	12.9116	8.26607
	45	14.3706	8.74635		45	15.1744	12.5528
	46	13.7707	10.5575		46	13.7165	10.965
	47	11.7188	10.1747		47	15.617	12.8645
	48	9.97396	6.61054		48	8.76631	5.88331
	49	10.9771	6.72782		49	17.0358	15.2307
	50	13.6252	11.4221		50	10.965	10.5874
	51	16.0327	13.5695		51	8.24188	5.03761
	52	12.4162	10.4235		52	15.4843	13.938
	53	17.1705	11.0387		53	17.3499	17.0982
	54	17.3168	13.9608		54	13.4131	13.1003
	55	13.2267	8.36115		55	15.0555	8.56661
	56	8.8325	8.43348		56	15.7808	12.2122
	57	15.0245	13.6795		57	8.57632	4.75728
	58	14.6697	11.079		58	12.5925	7.61537
	59	13.4556	9.804		59	10.9293	4.16012
	60	13.7903	11.1426		60	19.9367	9.53641
	61	10.2179	9.2889		61	12.0848	10.2715
	62	10.7844	9.36028		62	16.2494	14.7816
	63	15.1238	10.1771		63	13.7927	12.8094
	64	25.6972	16.1846		64	15.5829	13.4464
	65	13.0851	9.23229		65	17.5331	14.277
	66	15.246	9.06403		66	13.052	10.5976
	67	13.0975	10.191		67	12.9932	10.6157
	68	13.0034	8.8485		68	15.2357	13.6709
	69	14.123	10.7233		69	24.9824	13.5843
	70	17.8319	13.6886		70	15.6935	14.6998
	71	12.5044	10.3765		71	16.4969	10.6039
	72	9.33179	7.33827		72	12.0744	4.11589
	73	12.0187	9.94054		73	12.9301	8.84191
	74	12.6532	8.08183		74	12.9	5.8336
	75	14.2298	9.91371		75	13.9019	9.17352
	76	13.9421	7.91434		76	10.738	10.2326
	77	10.7404	10.5693		77	16.9305	12.7164
	78	16.9305	8.78053		78	16.5321	10.3498
	79	14.1342	10.2715		79	20.0764	18.5764
	80	14.0231	8.98381		80	15.0129	8.28919
	81	11.8879	9.60162		81	8.32025	7.79997
	82	10.7752	9.69218		82	19.0663	9.08878
	83	13.9111	9.01155		83	23.6675	14.3283
	84	14.9773	10.7775		84	13.1308	6.8843
	85	10.6509	8.76061		85	25.7332	13.1206
	86	12.4356	9.49093		86	18.995	9.95559
	87	10.4482	10.0396		87	19.2279	13.9702
	88	8.55106	6.00231		88	10.2982	8.57729
	89	8.95598	4.75728		89	13.9922	9.8784
	90	12.7118	10.6063		90	4.03834	3.9382
	91	10.4482	8.77295		91	7.51418	6.63316
	92	16.1945	12.0496		92	18.0236	13.6412
	93	12.6446	9.93384		93	16.3952	11.2015
	94	13.0641	7.55284		94	14.7872	7.31563
	95	16.0676	10.7528		95	13.9618	11.3637
	96	11.3784	9.59815		96	15.4655	12.4804
	97	10.8552	9.5782		97	13.1637	10.1918
	98	11.5331	9.18712		98	13.1782	10.7311
	99	13.6764	10.5811		99	16.679	8.07874
	100	8.5384	6.19334		100	16.3377	11.4025
	101	11.4054	8.39987		101	16.0477	9.39134
	102	9.66812	8.31325		102	13.0092	6.40599
	103	10.4998	8.40086		103	14.3839	7.15572
	104	10.5275	7.69039		104	13.1889	10.836
	105	15.8979	9.12897		105	21.7065	16.0754
	106	14.6867	8.8485		106	14.4261	10.6509
	107	13.0316	9.52244		107	17.087	16.0837
	108	10.4243	9.54338		108	19.4225	11.3637
	109	12.5714	7.63719		109	15.9757	8.48365
	110	9.92294	9.63449		110	10.7844	8.51888
	111	14.882	9.32019		111	13.8937	9.66037
	112	8.96063	7.50532		112	16.1286	15.2569
	113	8.16887	7.54953		113	17.0982	13.9535
	114	13.1206	8.96063		114	16.5226	9.54338
	115	10.0405	9.99396		115	12.623	6.23485
	116	8.48855	8.31325		116	18.995	12.0744
	117	8.19226	6.55366		117	14.4238	13.4166
	118	14.3399	7.62083		118	17.1614	13.1586
	119	9.79466	7.99904		119	14.2724	7.62083
	120	15.093	11.6164		120	12.8178	9.48269
	121	16.5246	12.2553		121	15.0691	11.382
	122	10.0925	8.76631		122	14.4238	13.4166
	123	14.5129	10.1983		123	17.1614	13.1586
	124	11.6358	10.2041		124	14.2724	7.62083
	125	12.3584	9.80739		125	12.8178	9.48269
	126	15.984	12.1733		126	15.0691	11.382
	127	10.9862	10.898		127	13.6429	11.9389
	128	9.42407	9.18168		128	14.5175	12.5218
	129	9.09336	7.76683		129	16.7371	11.6317
	130	11.4294	7.08444		130	17.1526	8.81175
	131	9.82435	8.63529		131	18.497	18.1634
	132	6.91445	6.19871		132	11.1307	10.5112
	133	8.54229	7.7925		133	17.5904	12.8774
	134	19.9379	12.6007		134	12.2482	11.8771
	135	9.31126	8.1229		135	17.6749	10.9658
	136	10.2041	8.19226		136	13.9135	10.1583
	137	10.9011	6.21346		137	19.2141	17.0214
	138	11.6279	10.0189		138	15.7962	15.0302
	139	13.1763	9.12988		139	22.3799	18.12
	140	12.6382	10.9764		140	11.5743	6.04651
	141	8.90754	8.39987		141	20.6956	19.8919
	142	11.2289	8.1229		142	11.3937	9.94639
	143	11.9859	9.00878		143	15.795	12.7345
	144	7.37108	6.58026		144	13.5013	8.30524
	145	10.5188	8.68909		145	15.507	11.7843
	146	9.69819	7.10438		146	17.5838	12.8094
	147	8.02085	7.69904		147	15.0842	13.5013
	148	19.0016	17.2402		148	15.5015	12.2333
	149	12.8599	11.1456		149	15.5144	11.8708
	150	9.74014	8.385		150	12.4697	10.4043
	151	9.48128	9.2485		151	17.3959	14.3926
	152	12.4082	7.9489		152	11.2022	4.29591
	153	9.00878	6.39422		153	17.5459	11.0777
	154	15.4762	11.2644		154	19.8111	17.8025
	155	10.911	9.64054		155	12.7769	11.123
	156	15.8381	8.00216		156	13.4556	9.08878
	157	12.4906	12.3369		157	8.14745	5.96477
	158	7.998	6.32626		158	9.18168	8.91594
	159	11.6558	8.27211		159	21.1953	11.1307
	160	18.47	11.3087		160	20.1789	13.8565
	161	12.8396	9.93635		161	18.6426	16.1559
	162	10.7698	8.26506		162	11.0308	7.29734
	163	13.5959	9.91371		163	12.705	8.45614
	164	8.31725	7.28365		164	12.4336	8.84944
	165	9.13808	7.05737		165	14.0231	9.37449
	166	14.0758	9.933		166	13.8391	13.2475
	167	13.932	9.16263		167	14.5429	11.5071
	168	7.388	6.6931		168	11.5601	9.29606
	169	8.80419	4.54439		169	18.2946	15.3266
	170	11.8236	9.21696		170	17.4603	13.5204
	171	14.2444	10.0934		171	13.468	11.0225
	172	10.8006	9.8885		172	14.7816	9.32019
	173	11.69	9.7102		173	17.0143	14.8103
	174	17.3925	12.5137		174	16.2613	12.0351
	175	10.8483	8.07668		175	18.2087	12.6378
	176	11.8146	9.58861		176	12.4894	11.5684
	177	9.64054	8.08183		177	16.9807	14.964
	178	12.7762	9.05944		178	17.7721	13.7927
	179	10.9764	8.49639		179	17.0578	13.1314
	180	8.10136	8.08183		180	13.5444	12.255
	181	12.4269	8.30123		181	12.4336	11.8855
	182	12.178	10.3401		182	22.5289	18.4308
	183	12.2794	8.23178		183	22.7936	13.434
	184	8.6977	6.40859		184	8.47973	7.8859
	185	14.3196	11.6136		185	19.1273	17.8806
	186	12.2122	11.7284		186	23.6355	12.3523
	187	10.5402	8.96063		187	12.2984	8.28116
	188	11.3784	9.54338		188	12.4924	7.08444
	189	16.0381	11.5568		189	18.7725	13.6448
	190	10.4482	9.58775		190	22.8461	10.7775
	191	14.0657	7.95419		191	20.5916	15.5111
	192	9.19888	9.18078		192	21.119	15.1744
	193	14.2835	8.77295		193	14.7495	12.513
	194	8.94204	6.41637		194	10.8391	9.04473
	195	16.0007	11.3937		195	15.7639	15.2569
	196	11.8792	11.0218		196	18.685	17.9829
	197	11.7899	9.58861		197	17.2421	12.4564
	198	12.3146	8.40977		198	22.0197	10.885
	199	13.8126	9.44787		199	13.9755	9.18078
	200	7.74215	6.29065		200	16.643	13.0825
	201	13.216	8.59183		201	19.0226	13.0316
	202	9.36028	6.40469		202	16.1503	12.6348
	203	12.1958	9.69476		203	7.76147	7.57154
	204	18.5711	8.67279		204	13.0443	8.30524
	205	10.3594	8.5384		205	11.3344	8.73016
	206	14.9779	12.2006		206	21.526	15.2994
	207	7.48645	4.80081		207	17.5326	9.7333
	208	10.2828	8.09725		208	16.0417	16.0402
	209	8.78053	5.934		209	15.3613	11.2015
	210	10.2171	9.52331		210	16.5125	14.2719
	211	20.7886	14.3972		211	14.9295	13.7129
	212	14.7816	12.5449		212	15.4245	11.4353
	213	13.5603	9.81163		213	16.0571	13.7523
	214	15.3526	9.28979		214	16.0007	8.96063
	215	16.1928	10.9771		215	17.0539	11.4254
	216	12.1157	8.385		216	20.7177	15.825
	217	11.6672	8.46303		217	16.8861	13.045
	218	14.4808	9.40374		218	19.2214	12.9
	219	8.50422	7.92904		219	19.9987	11.6136
	220	11.4875	10.3273		220	21.2881	15.0422
	221	14.2678	9.23229		221	18.7268	11.8582
	222	10.898	7.67089		222	12.9849	8.01982
	223	8.385	7.02073		223	21.6724	16.1379
	224	16.3438	10.4998		224	13.9565	12.9643
	225	19.7163	16.4575		225	15.1727	9.18168
	226	12.1212	7.13593		226	21.0571	13.7474
	227	15.216	10.7806		227	10.8022	6.87099
	228	11.4199	8.4246		228	16.8995	13.6892
	229	17.4456	10.5875		229	15.4633	9.01155
	230	12.7443	11.4752		230	13.5892	12.5528
	231	10.898	9.33536		231	21.1847	17.6772
	232	8.40086	6.59037		232	16.1534	11.3285
	233	14.974	9.75039		233	18.6279	10.8429
	234	9.94639	9.89355		234	14.2538	7.69039
	235	12.3847	8.81704		235	13.1365	9.03461
	236	10.2309	8.26506		236	21.0412	13.8054
	237	8.00736	7.48645		237	22.1827	15.3076
	238	9.18168	7.56824		238	13.9612	11.3109
	239	22.8461	13.1156		239	17.5743	11.4403
	240	17.4575	12.7266		240	19.6084	17.1575
	241	12.4804	9.20341		241	12.0496	8.85226
	242	7.51529	7.29734		242	20.5531	10.5976
	243	10.5283	9.82435		243
	244	9.63277	8.76915
	245	10.5882	9.46986
	246	12.2414	9.65089
	247	13.7613	11.5331
	248	13.9206	9.19527
	249	8.14745	6.11765
	250	10.2715	9.31394
	251	9.03092	7.48645
