# Supplementary material for: Constraints on the G1/S transition pathway may favor selection of multicellularity as a passenger phenotype
Source: eLife. 2026 Jun 18;15:RP109833. doi: 10.7554/eLife.109833 (PMC13278735; doi:10.7554/eLife.109833)
Supplement: Figure 6—source data 1. [file elife-109833-fig6-data1.xlsx]

## Sheet: Fig 6A
		amn1-368V cln3Δ						amn1-368V cln3Δ
		replicate #1	replicate #2	replicate #3	total	Cummulative cells forming a bud		Budding index	SD	n	Contigency table
number of initial cells		77	93	106	276						bud	unbud
# of initial cells forming a first bud at t=	60	0	0	0	0	0		0	0	276	0	276
	75	0	0	0	0	0		0	0	276	0	276
	90	0	0	0	0	0		0	0	276	0	276
	105	0	3	0	3	3		0.0108696	0.00180579	276	3	273
	120	2	6	0	8	11		0.0398551	0.00662122	276	11	265
	135	0	9	1	10	21		0.076087	0.0126405	276	21	255
	150	0	5	0	5	26		0.0942029	0.0156502	276	26	250
	165	1	3	2	6	32		0.115942	0.0192617	276	32	244
	180	0	6	4	10	42		0.152174	0.025281	276	42	234
		AMN1368D cln3Δ						AMN1368D cln3Δ
		replicate #1	replicate #2	replicate #3	total	Cummulative cells forming a bud		Budding index	SD	n	Contigency table
number of initial cells		109	108	120	337						bud	unbud
# of cell forming a first bud at t=	60	0	0	0	0	0		0	0	337	0	337
	75	1	3	0	4	4		0.0118694	0.00217894	337	4	333
	90	1	2	0	3	7		0.0207715	0.00381314	337	7	330
	105	3	4	0	7	14		0.041543	0.00762629	337	14	323
	120	6	10	4	20	34		0.10089	0.018521	337	34	303
	135	6	8	2	16	50		0.148368	0.0272367	337	50	287
	150	10	8	4	22	72		0.21365	0.0392209	337	72	265
	165	5	6	5	16	88		0.261128	0.0479367	337	88	249
	180	6	8	3	17	105		0.311573	0.0571971	337	105	232

## Sheet: Fig 6B
	CLN3 background	Point 0				Point 2				Point 4				Point 6
		1-2 cells	3 cells	4+ cells	tot	1-2 cells	3 cells	4+ cells	tot	1-2 cells	3 cells	4+ cells	tot	1-2 cells	3 cells	4+ cells	tot
	Competiton #1	119	30	153	302	103	33	129	265	115	25	130	270	113	22	126	261
		0.39404	0.0993377	0.506623		0.388679	0.124528	0.486792		0.425926	0.0925926	0.481481		0.43295	0.0842912	0.482759
	Competiton #2	113	42	156	311	124	35	161	320	117	17	136	270	120	20	144	284
		0.363344	0.135048	0.501608		0.3875	0.109375	0.503125		0.433333	0.062963	0.503704		0.422535	0.0704225	0.507042
	Competiton #3	114	50	159	323	94	30	128	252	125	30	148	303	139	21	153	313
		0.352941	0.154799	0.49226		0.373016	0.119048	0.507937		0.412541	0.0990099	0.488449		0.444089	0.0670927	0.488818
	% of each type of entity	39.404	9.93377	50.6623		38.8679	12.4528	48.6792		42.5926	9.25926	48.1481		43.295	8.42912	48.2759
		36.3344	13.5048	50.1608		38.75	10.9375	50.3125		43.3333	6.2963	50.3704		42.2535	7.04225	50.7042
		35.2941	15.4799	49.226		37.3016	11.9048	50.7937		41.2541	9.90099	48.8449		44.4089	6.70927	48.8818
	Mean	37.0108	12.9728	50.0163		38.3065	11.765	49.9285		42.3934	8.48552	49.1211		43.3192	7.39355	49.2873
	Contingency table	468		468		419		418		429		414		435		423
	cln3∆ background	Point 0				Point 2				Point 4				Point 6
		1-2 cells	3 cells	4+ cells	tot	1-2 cells	3 cells	4+ cells	tot	1-2 cells	3 cells	4+ cells	tot	1-2 cells	3 cells	4+ cells	tot
	Competiton #1	118	41	151	310	95	28	142	265	80	32	187	299	85	19	188	292
		0.380645	0.132258	0.487097		0.358491	0.10566	0.535849		0.267559	0.107023	0.625418		0.291096	0.0650685	0.643836
	Competiton #2	99	54	158	311	87	40	175	302	70	36	170	276	55	41	187	283
		0.318328	0.173633	0.508039		0.288079	0.13245	0.57947		0.253623	0.130435	0.615942		0.194346	0.144876	0.660777
	Competiton #3	116	36	156	308	97	28	175	300	86	22	172	280	77	34	190	301
		0.376623	0.116883	0.506494		0.323333	0.0933333	0.583333		0.307143	0.0785714	0.614286		0.255814	0.112957	0.631229
	% of each type of entity	38.0645	13.2258	48.7097		35.8491	10.566	53.5849		26.7559	10.7023	62.5418		29.1096	6.50685	64.3836
		31.8328	17.3633	50.8039		28.8079	13.245	57.947		25.3623	13.0435	61.5942		19.4346	14.4876	66.0777
		37.6623	11.6883	50.6494		32.3333	9.33333	58.3333		30.7143	7.85714	61.4286		25.5814	11.2957	63.1229
	Mean	35.8532	14.0925	50.0543		32.3301	11.0481	56.6218		27.6108	10.5343	61.8549		24.7085	10.7634	64.5281
	Contingency table	464		465		375		492		326		529		311		565

## Sheet: Fig 6C
	Empty overexpression vector	Point 0				Point 2				Point 4				Point 6
		1-2 cells	3 cells	4+ cells	tot	1-2 cells	3 cells	4+ cells	tot	1-2 cells	3 cells	4+ cells	tot	1-2 cells	3 cells	4+ cells	tot
	Competiton #1	126	37	159	322	111	44	155	310	123	47	176	346	115	34	158	307
		0.391304	0.114907	0.493789		0.358065	0.141935	0.5		0.355491	0.135838	0.508671		0.374593	0.110749	0.514658
	Competiton #2	132	21	162	315	100	59	166	325	115	49	163	327	105	51	147	303
		0.419048	0.0666667	0.514286		0.307692	0.181538	0.510769		0.351682	0.149847	0.498471		0.346535	0.168317	0.485149
	Competiton #3	136	30	159	325	118	42	153	313	100	46	152	298	120	36	162	318
		0.418462	0.0923077	0.489231		0.376997	0.134185	0.488818		0.33557	0.154362	0.510067		0.377358	0.113208	0.509434
	% of each type of entity	39.1304	11.4907	49.3789		35.8065	14.1935	50		35.5491	13.5838	50.8671		37.4593	11.0749	51.4658
		41.9048	6.66667	51.4286		30.7692	18.1538	51.0769		35.1682	14.9847	49.8471		34.6535	16.8317	48.5149
		41.8462	9.23077	48.9231		37.6997	13.4185	48.8818		33.557	15.4362	51.0067		37.7358	11.3208	50.9434
	Mean	40.9605	9.12937	49.9102		34.7585	15.2553	49.9862		34.7581	14.6683	50.5736		36.6162	13.0758	50.308
	Contingency table	482		480		474		474		480		491		461		467
	WHI5 overexpression vector	Point 0				Point 2				Point 4				Point 6
		1-2 cells	3 cells	4+ cells	tot	1-2 cells	3 cells	4+ cells	tot	1-2 cells	3 cells	4+ cells	tot	1-2 cells	3 cells	4+ cells	tot
	Competiton #1	106	53	155	314	100	45	189	334	78	39	234	351	61	26	220	307
		0.33758	0.16879	0.493631		0.299401	0.134731	0.565868		0.222222	0.111111	0.666667		0.198697	0.0846906	0.716612
	Competiton #2	124	42	172	338	94	48	188	330	73	52	218	343	53	39	221	313
		0.366864	0.12426	0.508876		0.284848	0.145455	0.569697		0.212828	0.151603	0.635569		0.169329	0.124601	0.70607
	Competiton #3	131	21	150	302	90	52	190	332	79	39	239	357	60	36	237	333
		0.433775	0.0695364	0.496689		0.271084	0.156627	0.572289		0.221289	0.109244	0.669468		0.18018	0.108108	0.711712
	% of each type of entity	33.758	16.879	49.3631		29.9401	13.4731	56.5868		22.2222	11.1111	66.6667		19.8697	8.46906	71.6612
		36.6864	12.426	50.8876		28.4848	14.5455	56.9697		21.2828	15.1603	63.5569		16.9329	12.4601	70.607
		43.3775	6.95364	49.6689		27.1084	15.6627	57.2289		22.1289	10.9244	66.9468		18.018	10.8108	71.1712
	Mean	37.9406	12.0862	49.9732		28.5111	14.5604	56.9285		21.878	12.3986	65.7234		18.2735	10.58	71.1465
	Contingency table	477		477		429		567		360		691		275		678
